1 **Microbial regulation of hexokinase 2 links mitochondrial metabolism and**  
2 **cell death in colitis**

3

4 Jacob Hamm<sup>1#</sup> & Finn Hinrichsen<sup>1#</sup>, Lena Schröder<sup>1</sup>, Neha Mishra<sup>1</sup>, Kensuke  
5 Shima<sup>2</sup>, Alesia Walker<sup>3</sup>, Nina Sommer<sup>1</sup>, Kenneth Klischies<sup>1</sup>, Daniela Prasse<sup>4</sup>,  
6 Johannes Zimmermann<sup>5</sup>, Sina Kaiser<sup>1</sup>, Dora Bordoni<sup>1</sup>, Antonella Fazio<sup>1</sup>, Georg  
7 Laue<sup>1</sup>, Valentina Tremaroli<sup>6</sup>, Marijana Basic<sup>7</sup>, Robert Häsler<sup>1</sup>, Ruth A. Schmitz<sup>4</sup>,  
8 Stefan Krautwald<sup>8</sup>, Andrea Wolf<sup>9</sup>, Bärbel Stecher<sup>10,11</sup>, Philippe Schmitt-  
9 Kopplin<sup>3</sup>, Christoph Kaleta<sup>5</sup>, Jan Rupp<sup>2</sup>, Fredrik Bäckhed<sup>6,12,13</sup>, Philip  
10 Rosenstiel<sup>1\*</sup> & Felix Sommer<sup>1\*</sup>

11

12 <sup>1</sup>Institute of Clinical Molecular Biology, University of Kiel, Rosalind-Franklin-  
13 Straße 12, 24105 Kiel, Germany

14 <sup>2</sup>Department of Infectiology and Microbiology, University of Lübeck,  
15 Ratzeburger Allee 160, 23538 Lübeck, Germany

16 <sup>3</sup>Research Unit Analytical BioGeoChemistry, Helmholtz Zentrum München,  
17 German Research Centre for Environmental Health (GmbH), Ingolstaedter  
18 Landstrasse 1, 85764 Neuherberg, Germany

19 <sup>4</sup>Institute of General Microbiology, University of Kiel, Am Botanischen Garten  
20 1-9, 24118 Kiel, Germany

21 <sup>5</sup>Institute of Experimental Medicine, University of Kiel, Michaelisstr. 5, 24105  
22 Kiel, Germany

23 <sup>6</sup>The Wallenberg Laboratory, Department of Molecular and Clinical Medicine,  
24 University of Gothenburg, Bruna Straket 16, 41345 Gothenburg, Sweden

25 <sup>7</sup>Institute for Laboratory Animal Science, Hannover Medical School, Carl-  
26 Neuberg-Str.1, 30625 Hannover, Germany

27 <sup>8</sup>Department of Nephrology and Hypertension, University Hospital Schleswig-  
28 Holstein, Fleckenstr. 4, 24105 Kiel, Germany

29 <sup>9</sup>Department of Biomedical Sciences, Cedars-Sinai Medical Center, 110  
30 George Burns Rd, Davis 4094, Los Angeles, CA 90048, USA

31 <sup>10</sup>Max von Pettenkofer Institute of Hygiene and Medical Microbiology, Ludwig-  
32 Maximilians-University of Munich, Pettenkoferstrasse 9a, 80336 Munich,  
33 Germany

34 <sup>11</sup>German Center for Infection Research (DZIF), partner site LMU Munich,  
35 Munich Germany

36 <sup>12</sup>Department of Clinical Physiology, Sahlgrenska University Hospital,  
37 Gothenburg, Sweden

38 <sup>13</sup>Novo Nordisk Foundation Center for Basic Metabolic Research, Faculty of  
39 Health and Medical Sciences, University of Copenhagen, Blegdamsvej 3B,  
40 2200, Copenhagen, Denmark

41

42 #These authors contributed equally with shared first authorship.

43 \*Shared senior authors

44

45 **Keywords:** hexokinase / inflammation / microbiota / intestinal epithelial cell /  
46 immunometabolism

47

48 **Correspondence:**

49 Felix Sommer, Institute of Clinical Molecular Biology (IKMB), Christian-  
50 Albrechts-University (CAU) Kiel, Rosalind-Franklin-Str. 12, Kiel D-24105,  
51 Germany; tel: +49(0) 431/500-15146; email: f.sommer@ikmb.uni-kiel.de

52 and

53 Philip Rosenstiel, Institute of Clinical Molecular Biology (IKMB), Christian-  
54 Albrechts-University (CAU) Kiel, Rosalind-Franklin-Str. 12, Kiel D-24105,  
55 Germany; tel: +49(0) 431/500-15105; email: p.rosenstiel@mucosa.de

## 56 **Summary**

57 Hexokinases (HK) catalyze the first step of glycolysis and thereby limit its pace.  
58 HK2 is highly expressed in the gut epithelium, plays a role in immune responses  
59 and is upregulated in inflammation and ulcerative colitis<sup>1-3</sup>. Here, we examined  
60 the microbial regulation of HK2 and its impact on intestinal inflammation by  
61 generating mice lacking HK2 specifically in intestinal epithelial cells (*Hk2<sup>ΔIEC</sup>*).  
62 *Hk2<sup>ΔIEC</sup>* mice were less susceptible to acute intestinal inflammation upon  
63 challenge with dextran sodium sulfate (DSS). Analyzing the epithelial  
64 transcriptome from *Hk2<sup>ΔIEC</sup>* mice during acute colitis revealed downregulation  
65 of cell death signaling and mitochondrial dysfunction dependent on loss of HK2.  
66 Using intestinal organoids derived from *Hk2<sup>ΔIEC</sup>* mice and Caco-2 cells lacking  
67 HK2, we identified peptidyl-prolyl cis-trans isomerase (PPIF) as a key target of  
68 HK2-mediated regulation of mitochondrial permeability and repression of cell-  
69 death during intestinal inflammation. The microbiota strongly regulated HK2  
70 expression and activity. The microbially-derived short-chain fatty acid (SCFA)  
71 butyrate repressed HK2 expression and oral supplementation protected  
72 wildtype but not *Hk2<sup>ΔIEC</sup>* mice from DSS colitis. Our findings define a novel  
73 mechanism how butyrate may act as a protective factor for intestinal barrier  
74 homeostasis and suggest targeted HK2 inhibition as a promising therapeutic  
75 avenue in intestinal inflammation.

76 Hexokinases (HK) catalyze the first step of glycolysis and thereby limit the rate  
77 of this fundamental biological process. HK2 is considered the prototypic  
78 inducible isoform of all HK family members as it can be upregulated by various  
79 environmental factors and signaling pathways, e.g. during inflammation and in  
80 ulcerative colitis <sup>1-3</sup>. In addition to its metabolic function, HK2 acts as a receptor  
81 for bacterial cell wall components <sup>4</sup> and has been suggested to counteract  
82 mitochondria-mediated cell death <sup>5</sup>. Chemical inhibition of HK impairs immune  
83 cell activation and promotes infection by *Listeria monocytogenes* in immune  
84 cells <sup>6</sup>, whereas hyperglycemia and high glycolytic flux have been associated  
85 with an increased risk of enteric infection in intestinal epithelial cells <sup>7</sup>. However,  
86 complete ablation of HK2 is embryonically lethal <sup>8</sup>. In the intestine, *Hk2* is  
87 predominantly expressed by intestinal epithelial cells (IECs) <sup>9,10</sup>. Therefore, we  
88 aimed to investigate, whether selective ablation of HK2 in IECs alters epithelial  
89 function during intestinal inflammation. Here we show that (i) loss of HK2 in  
90 IECs protects from DSS-induced colitis by decreasing inflammation-induced  
91 epithelial cell death and that (ii) specific bacterial species and the microbial  
92 metabolite butyrate ameliorate colitis by repressing *Hk2* expression.

93 To determine the role of epithelial HK2 for intestinal inflammation, we generated  
94 *Hk2<sup>fl/fl</sup>-Villin::Cre<sup>+</sup>* mice lacking HK2 specifically in IECs, hereinafter referred to  
95 as *Hk2<sup>ΔIEC</sup>* mice. We used littermate *Hk2<sup>fl/fl</sup>* mice, hereinafter referred to as WT  
96 mice, as controls. Unchallenged *Hk2<sup>ΔIEC</sup>* mice did not display any major inflam-  
97 matory or metabolic phenotype except for an improved glucose tolerance (Ex-  
98 tended data Figure 1), compared to littermate controls. However, when *Hk2<sup>ΔIEC</sup>*  
99 mice and their WT littermates were challenged with dextran sodium sulfate  
100 (DSS) to induce intestinal inflammation, *Hk2<sup>ΔIEC</sup>* mice lost significantly less

101 weight compared to WT littermates (Fig. 1a). The disease activity index (DAI),  
102 a measure of intestinal inflammation comprised of weight loss, stool con-  
103 sistency and fecal blood occurrence, confirmed the ameliorated disease course  
104 in *Hk2<sup>ΔIEC</sup>* mice (Fig. 1b). Additionally, *Hk2<sup>ΔIEC</sup>* mice displayed lower serum lev-  
105 els of the pro-inflammatory cytokine KC/CXCL1 as measured by ELISA (Fig.  
106 1c). Histological evaluation of Hematoxylin and Eosin (H&E)-stained colon sec-  
107 tions demonstrated a reduced score consisting of transmural inflammation,  
108 crypt hyperplasia, epithelial injury, polymorphonuclear and mononuclear cell in-  
109 filtrates in *Hk2<sup>ΔIEC</sup>* mice (Fig. 1d). In WT mice, HK2 expression increased during  
110 the course of colitis (Fig. 1e, Extended data figure 2). We therefore investigated  
111 whether *Hk2* expression is dysregulated in patients suffering from intestinal in-  
112 flammation by evaluating expression data from colon-biopsies of patients suf-  
113 fering from Crohn's Disease (CD), Ulcerative Colitis (UC) or Non-IBD-Colitis  
114 (NIC) <sup>11</sup>. Biopsies were taken both from the site of inflammation and adjacent  
115 non-inflamed tissue. We found that *Hk2* expression was significantly higher in  
116 the inflamed tissue of CD ( $p = 0.010$ ) and NIC ( $p = 0.027$ ) patients, while only  
117 a trend was observed in UC patients ( $p = 0.180$ ) (Fig. 1f). This data is in agree-  
118 ment with a published report revealing upregulation of *Hk2* expression in UC  
119 patients suggesting inhibition of HK2 as a potential therapeutic approach <sup>3</sup>. To  
120 decipher the molecular mechanisms protecting *Hk2<sup>ΔIEC</sup>* mice from intestinal in-  
121 flammation, we isolated IECs from WT and *Hk2<sup>ΔIEC</sup>* mice on day 0 (baseline), 3  
122 (early inflammation) and 7 (late inflammation) from an independent acute DSS  
123 experiment and performed RNA sequencing. While we did not find any differ-  
124 entially expressed genes on day 3, we identified 420 differentially expressed  
125 genes on day 7 in comparison between WT and *Hk2<sup>ΔIEC</sup>* mice (Extended data

126 Figure 3 and Extended data Table 1). Gene Ontology (GO) analysis of these  
127 differentially expressed genes revealed a downregulation of genes involved in  
128 cell death-signaling and regulation of mitochondrial membrane permeability in  
129 *Hk2<sup>ΔIEC</sup>* mice (Fig. 1g). We confirmed a reduction of cell death in *Hk2<sup>ΔIEC</sup>* mice  
130 by TUNEL-staining of colon sections from day 3 and day 7 of the experiment.  
131 In accordance with our transcriptomics data, we found fewer TUNEL-positive  
132 cells in the tip compartment of colonic crypts in *Hk2<sup>ΔIEC</sup>* mice at day 7 indicating  
133 less cell death (Fig. 1h). This finding coincides with the spatial expression pro-  
134 file of HK2, which is mainly restricted to the colonic epithelial tip (Extended data  
135 Figure 4).

136 To further study the molecular processes involved in HK2-dependent protection  
137 from inflammation, we generated intestinal organoids derived from *Hk2<sup>ΔIEC</sup>* and  
138 WT mice and investigated their response to stimulation with tumor necrosis fac-  
139 tor (TNF). Western blot analysis demonstrated higher HK2 levels upon TNF  
140 stimulation (Fig. 2a). Organoids derived from *Hk2<sup>ΔIEC</sup>* mice exhibited lower lev-  
141 els of cleaved Caspase 3 and Poly(ADP-Ribose)-Polymerase 1 (PARP1),  
142 markers for mitochondria-related types of cell death, compared to WT organ-  
143 oids upon TNF stimulation. This data therefore supported reduced levels of cell  
144 death in the absence of HK2 under inflammatory conditions. Furthermore, our  
145 transcriptome data suggested dysregulated mitochondrial function as a conse-  
146 quence of loss of HK2. We therefore performed metabolic flux analysis using  
147 Seahorse technology. As the 3D structure of organoids limits their use in this  
148 assay, we generated a Caco-2 cell clone lacking HK2 using the CRISPR Cas9  
149 system, hereinafter named Caco-2<sup>ΔHK2</sup>. We assessed glycolytic flux by meas-

150 uring the extracellular acidification rate (ECAR) upon addition of glucose to in-  
151 duce glycolytic flux, oligomycin to stress the glycolytic reserve and 2-deoxy-  
152 glucose to inhibit glycolysis. Throughout the entire experiment, we did not ob-  
153 serve any significant changes between Caco-2 <sup>$\Delta$ Hk2</sup> and Caco-2<sup>WT</sup> cells indicat-  
154 ing that ablation of HK2 did not affect glycolytic function (Fig. 2b). We also  
155 measured the basal oxygen consumption rate (OCR), which comprises both  
156 mitochondrial and non-mitochondrial oxygen consumption. Interestingly, we  
157 discovered significantly lower basal mitochondrial respiration as well as a dras-  
158 tically lower maximal mitochondrial respiration in Caco-2 <sup>$\Delta$ Hk2</sup> cells compared to  
159 Caco-2<sup>WT</sup> cells (Fig. 2c). Since FCCP (cyanide-4-(trifluoromethoxy)-phenylhy-  
160 drazone) induces maximal respiration by depolarization of the mitochondrial  
161 membrane, our data therefore pointed towards a decrease in mitochondrial per-  
162 meability. These results support our findings from transcriptome sequencing  
163 and GO analysis, which also indicated a decreased regulation of mitochondrial  
164 permeability. We therefore screened our transcriptome data for differentially  
165 expressed genes that are involved in regulation of mitochondrial membrane  
166 permeability. mRNA levels of *Ppif* (peptidyl-prolyl cis-trans isomerase), encod-  
167 ing for a main component of the mitochondrial permeability transition pore  
168 (MPTP), were downregulated in IECs of Hk2 <sup>$\Delta$ IEC</sup> mice on day 7 of colitis (Fig.  
169 2d). PPIF coordinates mitochondrial permeability and metabolism<sup>12-15</sup> and has  
170 been suggested to directly interact with HK2 to suppress cell death<sup>5</sup>. To vali-  
171 date our *in vivo* findings and transcriptome data, we stimulated Caco-2 <sup>$\Delta$ Hk2</sup> and  
172 Caco-2<sup>WT</sup> cells with TNF and IL17A<sup>16</sup> as well as with IFN- $\beta$  to induce inflam-  
173 matory responses and cell death. Indeed, *Ppif* expression was downregulated  
174 under both conditions (Fig. 2e). Based on our findings and since PPIF interacts

175 with HK2<sup>5</sup> and since *Ppif*<sup>-/-</sup> mice are less susceptible to colitis<sup>17</sup>, we propose  
176 that mechanistically the HK2-dependent protection from intestinal inflammation  
177 could be mediated by lower levels of PPIF and a subsequent decrease in MPTP  
178 opening and mitochondrial membrane permeability.

179 Dysregulated host-microbiota interactions are a key element of intestinal in-  
180 flammation<sup>18</sup>. By comparing the transcriptomes of intestinal epithelial cell frac-  
181 tions isolated from germ-free (GF) and conventionally raised (CR) mice<sup>19</sup>, we  
182 identified HK2 as significantly upregulated by the presence of a complex micro-  
183 bial community. *Hk2* expression was specifically induced in the epithelial tips of  
184 both ileum and colon by the microbiota (Fig. 3a). Upon colonization of GF mice  
185 with a normal microbiota *Hk2* expression increased and normalized to that of  
186 CR mice, demonstrating that the intestinal microbiota stimulates *Hk2* expres-  
187 sion (Fig. 3b). However, although we were able to show a distinct effect of the  
188 microbiota on *Hk2* expression, ablation of HK2 in IECs in turn did not impact  
189 the composition of the intestinal microbiota as assessed by 16S rRNA amplicon  
190 sequencing under basal unchallenged conditions (Extended data Fig. 5). Next,  
191 we investigated how the microbiota regulates epithelial *Hk2* expression, specif-  
192 ically whether only specific bacterial species modulate *Hk2* expression. To that  
193 end, we colonized GF mice with either single bacterial species or minimal con-  
194 sortia - namely the Altered Schaedler Flora (ASF)<sup>20</sup> and the Oligo Mouse Mi-  
195 crobiota (OMM)<sup>21</sup>. Both minimal microbial consortia readily induced *Hk2* ex-  
196 pression to a similar level as observed in CR mice (Fig. 3c). Mono-colonization  
197 with the Gram-negative bacterium *Bacteroides thetaiotaomicron* was also able  
198 to induce *Hk2* expression, whereas the Gram-negative bacterium *Escherichia*  
199 *coli* and the Gram-positive bacterium *Bifidobacterium longum* did not alter *Hk2*



200 mRNA levels (Fig. 3c). Together, this data suggested a specific interaction be-  
201 tween specific bacterial features and epithelial cells rather than general princi-  
202 ples such as recognition of lipopolysaccharide or peptidoglycan as a mecha-  
203 nism regulating HK2 expression. We thus next aimed to disentangle the effects  
204 of individual OMM bacteria to identify potential candidate principles regulating  
205 *Hk2* expression. To that end, we stimulated Caco-2 cells with sterile-filtered  
206 culture supernatants of the individual species of the OMM consortium. We iden-  
207 tified *Enterococcus faecalis* KB1 as the key inducer among this minimal micro-  
208 biota (Fig. 3d). *Clostridium innocuum* I46 and *Flavonifractor plautii* YL31, both  
209 well-known producers of short-chain fatty acids (SCFA)<sup>22</sup>, significantly reduced  
210 *Hk2* expression (Fig. 3d). As other fatty acids such as palmitic acid can inhibit  
211 HK activity<sup>23,24</sup>, we hypothesized that SCFAs could drive the regulation of *Hk2*  
212 expression. To test this hypothesis, we generated individual metabolic models  
213 predicting the SCFA synthesis potential for each OMM member (Extended data  
214 Figure 6a). A linear model of the predicted *Hk2* expression based on the butyr-  
215 ate and acetate levels significantly correlated with the experimental *Hk2* ex-  
216 pression determined by qPCR (p value = 0.008, Pearson R = 0.75, R<sup>2</sup> = 0.56,  
217 AIC = -8.0; Extended data Figure 6b and Extended data Table 2). The predicted  
218 SCFA levels in the OMM culture supernatants were validated by targeted  
219 metabolomics (Extended data Figure 6c). We next stimulated Caco-2 cells with  
220 butyrate and acetate and found that acetate upregulated, whereas butyrate  
221 downregulated *Hk2* expression (Fig. 3e). We then tested whether stimulation  
222 of Caco-2 cells with butyrate also affected *Ppif* expression. Indeed, butyrate  
223 also downregulated *Ppif* expression (Fig. 3f). Together this data suggested that  
224 the microbial metabolite butyrate could potentially protect from inflammation via

225 HK2- and PPIF-mediated changes in mitochondrial function and cell death. We  
226 therefore tested whether dietary supplementation of butyrate also functions *in*  
227 *vivo* to downregulate HK2 levels. We fed a butyrate-enriched diet to WT mice  
228 for 10 days and quantified HK2 levels in colon sections by immunohistochem-  
229 istry, which demonstrated a clear downregulation of HK2 (Fig. 3g). We then set  
230 out to test whether the SCFA-dependent modulation of HK2 levels also impacts  
231 colitis outcome. Therefore, we supplemented *Hk2*<sup>ΔIEC</sup> mice and their WT litter-  
232 mates with three different diets – a control diet, a butyrate-enriched diet or an  
233 acetate-containing diet – and induced colitis by performing the DSS colitis  
234 model as before. Indeed, in WT mice dietary supplementation of butyrate ame-  
235 liorated colitis, which was evident by less weight loss (Fig. 3h), a lower DAI (Fig.  
236 3i), lower serum levels of KC/CXCL1 (Fig. 3j), fewer TUNEL-positive epithelial  
237 cells (Fig. 3k) and a lower histological score (Fig. 3l). In contrast, acetate sup-  
238 plementation worsened colitis outcome as evident by increased weight loss  
239 (Fig. 3h) and a higher DAI (Fig. 3i), which even led to premature termination of  
240 this experimental group for ethical reasons on day 8. Acetate supplementation  
241 significantly increased whereas butyrate lowered colonic HK2 levels in WT mice  
242 (Fig. 3m). In *Hk2*<sup>ΔIEC</sup> mice, treatment with butyrate did not impact colitis outcome  
243 as measured by weight development, DAI, serum KC/CXCL1 levels, TUNEL-  
244 positive epithelial cells or histological score (Fig. 3 h-l and Extended data figure  
245 7). Together this data therefore demonstrates that ablation of HK2 in the intes-  
246 tinal epithelium completely blunted the butyrate-dependent effects on colitis.  
247 SCFAs are well-known for their pleiotropic effects on host physiology including  
248 intestinal motility, inflammation and carcinogenesis<sup>25</sup>. Regarding colitis, ace-

249   tate was shown to exacerbate<sup>26</sup> whereas butyrate ameliorates<sup>27-29</sup> inflamma-  
250   tion. Butyrate is produced by the metabolic activity of the colonic microorgan-  
251   isms through fermentation of dietary fiber<sup>30</sup>. Mechanistically, butyrate is sensed  
252   by the G protein-coupled receptors GPR41 (FFAR3)<sup>31,32</sup>, GPR43 (FFAR2)<sup>31,33-</sup>  
253   <sup>35</sup> and GPR109a (HCA2)<sup>29,36</sup>, which could trigger a signaling response leading  
254   to reduced *Hk2* expression. However, silencing these GPRs by siRNAs did not  
255   alter repression of *Hk2* expression by butyrate in Caco-2 cells (Extended data  
256   Figure 6d-e), which argues against a prominent role of these GPRs. Alterna-  
257   tively, butyrate also directly acts on histone deacetylases (HDACs)<sup>25</sup>, which  
258   function as epigenetic regulators and thereby could impact on *Hk2* expression.  
259   Using either a pan-HDAC inhibitor or those specific for single HDAC classes or  
260   enzymes, we found that class I HDACs, possibly HDAC2 or HDAC3 mediate  
261   the repression of *Hk2* expression by butyrate (Extended data Figure 6f).

262   Taken together, our study revealed a novel regulatory circuit consisting of epi-  
263   thelial HK2 and the microbial metabolite butyrate. We found that ablation of  
264   HK2 protects from colitis by suppression of cell death that was linked to altered  
265   mitochondrial function, which could be due to PPIF-dependent opening of the  
266   MPTP. Moreover, we identified the intestinal microbiota and its metabolite bu-  
267   tyrate as potent regulators of HK2 and we demonstrated that the protective ef-  
268   fect of dietary butyrate supplementation is dependent on the functional pres-  
269   ence of HK2. Previous studies already pointed towards a beneficial function of  
270   butyrate-producing bacteria for a healthy intestine and prevention of gut inflam-  
271   mation<sup>37-42</sup> and clinical trials using oral supplementation of germinated barley  
272   foods that are fermented into SCFA by the microbiota or rectal enema with bu-  
273   tyrate indeed demonstrated beneficial effects in ulcerative colitis patients<sup>43,44</sup>.

274 Our findings therefore shed light on the molecular mechanism how butyrate  
275 mediates its beneficial effects and may guide the development of more specific  
276 therapeutic options by targeting HK2.

277 **References:**

- 278 1 Everts, B. *et al.* TLR-driven early glycolytic reprogramming via the kinases  
279 TBK1-IKK $\epsilon$  supports the anabolic demands of dendritic cell activation. *Nature*  
280 *Immunology* **15**, 323-332, doi:10.1038/ni.2833 (2014).
- 281 2 Perrin-Cocon, L. *et al.* Toll-like Receptor 4-Induced Glycolytic Burst in Human  
282 Monocyte-Derived Dendritic Cells Results from p38-Dependent Stabilization  
283 of HIF-1 $\alpha$  and Increased Hexokinase II Expression. *J Immunol* **201**, 1510-  
284 1521, doi:10.4049/jimmunol.1701522 (2018).
- 285 3 Taman, H. *et al.* Genome-wide DNA Methylation in Treatment-naive  
286 Ulcerative Colitis. *J Crohns Colitis* **12**, 1338-1347, doi:10.1093/ecco-jcc/jjy117  
287 (2018).
- 288 4 Wolf, A. J. *et al.* Hexokinase Is an Innate Immune Receptor for the Detection  
289 of Bacterial Peptidoglycan. *Cell* **166**, 624-636, doi:10.1016/j.cell.2016.05.076  
290 (2016).
- 291 5 Machida, K., Ohta, Y. & Osada, H. Suppression of apoptosis by cyclophilin D  
292 via stabilization of hexokinase II mitochondrial binding in cancer cells. *J Biol*  
293 *Chem* **281**, 14314-14320, doi:10.1074/jbc.M513297200 (2006).
- 294 6 Li, Y. *et al.* Immune effects of glycolysis or oxidative phosphorylation  
295 metabolic pathway in protecting against bacterial infection. *J Cell Physiol* **234**,  
296 20298-20309, doi:10.1002/jcp.28630 (2019).
- 297 7 Thaiss, C. A. L., M.; Grosheva, I.; Zheng, D.; Soffer, E.; Blacher, E.;  
298 Braverman, S.; Tengeler, A.C.; Barak, O.; Elazar, M.; Ben-Zeev, R.; Lehavi-  
299 Regev, D.; Katz, M.N.; Pevsner-Fischer, M.; Gertler, A.; Halpern, Z.; Harmelin,  
300 A.; Aamar, S.; Serradas, P.; Grosefld, A.; Shapiro, H.; Geiger, B.; Elinav, E.  
301 Hyperglycemia drives intestinal barrier dysfunction and risk for enteric  
302 infection. *Science* **359**, 1376–1383 (2018).
- 303 8 Heikkinen, S. P., M.; Halmekytö, M.; Suppola, S.; Pirinen, E.; Deeb, S.; Jänne,  
304 J.; Laakso, M. Hexokinase II-deficient Mice: Prenatal Death of Homozygotes  
305 Without Disturbances in Glucose Tolerance in Heterozygotes. *The Journal of*  
306 *Biological Chemistry* **274**, 22517-22523 (1999).
- 307 9 Tabula Muris, C. *et al.* Single-cell transcriptomics of 20 mouse organs creates  
308 a Tabula Muris. *Nature* **562**, 367-372, doi:10.1038/s41586-018-0590-4 (2018).
- 309 10 Sommer, F., Nookaew, I., Sommer, N., Fogelstrand, P. & Backhed, F. Site-  
310 specific programming of the host epithelial transcriptome by the gut microbiota.  
311 *Genome biology* **16**, 62, doi:10.1186/s13059-015-0614-4 (2015).
- 312 11 Hasler, R. *et al.* Uncoupling of mucosal gene regulation, mRNA splicing and  
313 adherent microbiota signatures in inflammatory bowel disease. *Gut* **66**, 2087-  
314 2097, doi:10.1136/gutjnl-2016-311651 (2017).
- 315 12 Nakagawa, T. S., S.; Watanabe, T. ; Yamaguchi, O. ; Otsu, K. ; Yamagata, H. ;  
316 Inohara, H. ; Kubo, T. & Tsujimoto, Y. Cyclophilin D-dependent mitochondrial  
317 permeability transition regulates some necrotic but not apoptotic cell death.  
318 *Nature* **434**, 652-658, doi:10.1038/nature03417 (2005).
- 319 13 Baines, C. P. K., R.A. ; Purcell, N.H. ; Blair, N.S. ; Osinska, H. ; Hambleton,  
320 M.A. ; Brunskill, E.W. ; Sayen, M. R. ; Gottlieb, R. A. ; Dorn II, G.W. ; Robbins,  
321 J. & Molken J.D. Loss of cyclophilin D reveals a critical role for  
322 mitochondrial permeability transition in cell death. *Nature* **434**, 658-662,  
323 doi:10.1038/nature03317 (2005).

- 324 14 Basso, E. *et al.* Properties of the permeability transition pore in mitochondria  
325 devoid of Cyclophilin D. *J Biol Chem* **280**, 18558-18561,  
326 doi:10.1074/jbc.C500089200 (2005).
- 327 15 Schinzel, A. C. *et al.* Cyclophilin D is a component of mitochondrial  
328 permeability transition and mediates neuronal cell death after focal cerebral  
329 ischemia. *Proc Natl Acad Sci U S A* **102**, 12005-12010,  
330 doi:10.1073/pnas.0505294102 (2005).
- 331 16 Straus, D. S. TNF $\alpha$  and IL-17 cooperatively stimulate glucose metabolism and  
332 growth factor production in human colorectal cancer cells. *Molecular Cancer*  
333 **12** (2013).
- 334 17 Zhu, X., Hogan, S. P., Molkentin, J. D. & Zimmermann, N. Cyclophilin D  
335 regulates necrosis, but not apoptosis, of murine eosinophils. *Am J Physiol*  
336 *Gastrointest Liver Physiol* **310**, G609-617, doi:10.1152/ajpgi.00389.2015  
337 (2016).
- 338 18 Sommer, F. & Backhed, F. The gut microbiota--masters of host development  
339 and physiology. *Nat Rev Microbiol* **11**, 227-238, doi:10.1038/nrmicro2974  
340 (2013).
- 341 19 Sommer, F., Nookaew, I., Sommer, N., Fogelstrand, P. & Backhed, F. Site-  
342 specific programming of the host epithelial transcriptome by the gut microbiota.  
343 *Genome Biol* **16**, 62, doi:10.1186/s13059-015-0614-4 (2015).
- 344 20 Dewhirst, F. E. C., C.C.; Paster, B.J.; Ericson, R.L.; Orcutt, R.P.; Schauer, D.B.;  
345 Fox, J.G. Phylogeny of the Defined Murine Microbiota: Altered Schaedler  
346 Flora. *Applied and Environmental Microbiology* **65**, 3287-3292 (1999).
- 347 21 Brugiroux, S. *et al.* Genome-guided design of a defined mouse microbiota that  
348 confers colonization resistance against *Salmonella enterica* serovar  
349 Typhimurium. *Nat Microbiol* **2**, 16215, doi:10.1038/nmicrobiol.2016.215  
350 (2016).
- 351 22 Braune, A. & Blaut, M. Bacterial species involved in the conversion of dietary  
352 flavonoids in the human gut. *Gut Microbes* **7**, 216-234,  
353 doi:10.1080/19490976.2016.1158395 (2016).
- 354 23 Mogilenko, D. A. *et al.* Metabolic and Innate Immune Cues Merge into a  
355 Specific Inflammatory Response via the UPR. *Cell* **177**, 1201-1216 e1219,  
356 doi:10.1016/j.cell.2019.03.018 (2019).
- 357 24 Weber, G. C., H.J; Lea, M.A.; Stamm, N.B. Feedback Inhibition of Key  
358 Glycolytic Enzymes in Liver: Action of Free Fatty Acids. *Science* **154**, 1357-  
359 1360 (1966).
- 360 25 Koh, A., De Vadder, F., Kovatcheva-Datchary, P. & Backhed, F. From Dietary  
361 Fiber to Host Physiology: Short-Chain Fatty Acids as Key Bacterial  
362 Metabolites. *Cell* **165**, 1332-1345, doi:10.1016/j.cell.2016.05.041 (2016).
- 363 26 Maslowski, K. M. *et al.* Regulation of inflammatory responses by gut  
364 microbiota and chemoattractant receptor GPR43. *Nature* **461**, 1282-1286,  
365 doi:10.1038/nature08530 (2009).
- 366 27 Furusawa, Y. *et al.* Commensal microbe-derived butyrate induces the  
367 differentiation of colonic regulatory T cells. *Nature* **504**, 446-450,  
368 doi:10.1038/nature12721 (2013).
- 369 28 Chang, P. V., Hao, L., Offermanns, S. & Medzhitov, R. The microbial  
370 metabolite butyrate regulates intestinal macrophage function via histone  
371 deacetylase inhibition. *Proc Natl Acad Sci U S A* **111**, 2247-2252,  
372 doi:10.1073/pnas.1322269111 (2014).

- 373 29 Singh, N. *et al.* Activation of Gpr109a, receptor for niacin and the commensal  
374 metabolite butyrate, suppresses colonic inflammation and carcinogenesis.  
375 *Immunity* **40**, 128-139, doi:10.1016/j.immuni.2013.12.007 (2014).
- 376 30 Louis, P. *et al.* Restricted distribution of the butyrate kinase pathway among  
377 butyrate-producing bacteria from the human colon. *J Bacteriol* **186**, 2099-2106,  
378 doi:10.1128/jb.186.7.2099-2106.2004 (2004).
- 379 31 Brown, A. J. *et al.* The Orphan G protein-coupled receptors GPR41 and GPR43  
380 are activated by propionate and other short chain carboxylic acids. *J Biol Chem*  
381 **278**, 11312-11319, doi:10.1074/jbc.M211609200 (2003).
- 382 32 De Vadder, F. *et al.* Microbiota-generated metabolites promote metabolic  
383 benefits via gut-brain neural circuits. *Cell* **156**, 84-96,  
384 doi:10.1016/j.cell.2013.12.016 (2014).
- 385 33 Le Poul, E. *et al.* Functional characterization of human receptors for short chain  
386 fatty acids and their role in polymorphonuclear cell activation. *J Biol Chem* **278**,  
387 25481-25489, doi:10.1074/jbc.M301403200 (2003).
- 388 34 Nilsson, N. E., Kotarsky, K., Owman, C. & Olde, B. Identification of a free fatty  
389 acid receptor, FFA2R, expressed on leukocytes and activated by short-chain  
390 fatty acids. *Biochem Biophys Res Commun* **303**, 1047-1052, doi:10.1016/s0006-  
391 291x(03)00488-1 (2003).
- 392 35 Sina, C. *et al.* G protein-coupled receptor 43 is essential for neutrophil  
393 recruitment during intestinal inflammation. *J Immunol* **183**, 7514-7522,  
394 doi:10.4049/jimmunol.0900063 (2009).
- 395 36 Macia, L. *et al.* Metabolite-sensing receptors GPR43 and GPR109A facilitate  
396 dietary fibre-induced gut homeostasis through regulation of the inflammasome.  
397 *Nat Commun* **6**, 6734, doi:10.1038/ncomms7734 (2015).
- 398 37 Imhann, F. *et al.* Interplay of host genetics and gut microbiota underlying the  
399 onset and clinical presentation of inflammatory bowel disease. *Gut* **67**, 108-119,  
400 doi:10.1136/gutjnl-2016-312135 (2018).
- 401 38 Sommer, F. *et al.* Microbiomarkers in inflammatory bowel diseases: caveats  
402 come with caviar. *Gut* **66**, 1734-1738, doi:10.1136/gutjnl-2016-313678 (2017).
- 403 39 Lloyd-Price, J. *et al.* Multi-omics of the gut microbial ecosystem in  
404 inflammatory bowel diseases. *Nature* **569**, 655-662, doi:10.1038/s41586-019-  
405 1237-9 (2019).
- 406 40 Parada Venegas, D. *et al.* Short Chain Fatty Acids (SCFAs)-Mediated Gut  
407 Epithelial and Immune Regulation and Its Relevance for Inflammatory Bowel  
408 Diseases. *Front Immunol* **10**, 277, doi:10.3389/fimmu.2019.00277 (2019).
- 409 41 Effenberger, M. *et al.* Microbial butyrate synthesis indicates therapeutic  
410 efficacy of azathioprine in IBD patients. *Journal of Crohn's & colitis*,  
411 doi:10.1093/ecco-jcc/jjaa152 (2020).
- 412 42 Aden, K. *et al.* Metabolic Functions of Gut Microbes Associate With Efficacy  
413 of Tumor Necrosis Factor Antagonists in Patients With Inflammatory Bowel  
414 Diseases. *Gastroenterology* **157**, 1279-1292 e1211,  
415 doi:10.1053/j.gastro.2019.07.025 (2019).
- 416 43 Mitsuyama, K. S., T.; Kanauchi, O.; Iwanaga, T.; Tomiyasu, N. Treatment of  
417 ulcerative colitis with germinated barley foodstuff feeding: a pilot study.  
418 *Aliment Pharmacol Ther* **12**, 1225-1230 (1998).
- 419 44 Breuer, R. I. B., S. K.; Christ, M. L.; Bean, J.; Vernia, P.; Paoluzi, P.; Di Paolo,  
420 M. C.; Caprilli, R. Rectal Irrigation with Short-Chain Fatty Acids for Distal  
421 Ulcerative Colitis. *Digestive Diseases and Sciences* **36**, 185-187 (1991).
- 422

## 423 **Figure Legends**

### 424 **Figure 1: Loss of HK2 in the intestinal epithelium protects from colitis. a)**

425 Body weight loss of WT and *Hk2*<sup>ΔIEC</sup> mice lacking HK2 in intestinal epithelial  
426 cells during DSS-induced colitis. \* p<0.01 and \*\* p<0.01 WT versus *Hk2*<sup>ΔIEC</sup>  
427 mice using two-way ANOVA. **b)** Disease activity index (DAI) consisting of stool  
428 consistency, fecal blood occurrence and body weight loss. \* p<0.01 and \*\*  
429 p<0.01 WT versus *Hk2*<sup>ΔIEC</sup> mice using two-way ANOVA. **c)** KC/CXCL1 (pro-  
430 inflammatory cytokine) levels in serum of WT and *Hk2*<sup>ΔIEC</sup> mice as determined  
431 by ELISA. \* p<0.01 using Mann-Whitney U-test. **d)** Histological score of H&E-  
432 stained sections from colon of WT and *Hk2*<sup>ΔIEC</sup> mice including representative  
433 images of the experimental groups. The scale bar represents 500 μm. \* p<0.01  
434 using Mann-Whitney U-test. **e)** Relative HK2 protein expression during the  
435 course of DSS-induced colitis in colon epithelium of WT mice as determined by  
436 immunohistochemistry. \*\* p<0.01 versus D0 using one-way ANOVA. **f)** *Hk2*  
437 expression is dysregulated in inflamed human intestinal mucosa. *Hk2*  
438 expression was determined in inflamed and non-inflamed intestinal mucosal  
439 biopsies from patients with Crohn's Disease (CD), Ulcerative Colitis (UC) or  
440 non-IBD Colitis (NIC) by RNA-Seq. n=4-6 per group. \* p<0.05. **g)** Gene  
441 ontology terms enriched in up- and down-regulated genes in transcriptomes of  
442 colonic IEC isolated from *Hk2*<sup>ΔIEC</sup> compared to WT mice sacrificed on day 7 of  
443 DSS colitis. **h)** Fewer apoptotic cells per colon crypt in *Hk2*<sup>ΔIEC</sup> mice as  
444 determined by TUNEL assay including representative images. The scale bar  
445 represents 50 μm. \* p<0.01 using two-way ANOVA.

### 446 **Figure 2: Dysregulated mitochondrial function in response to loss of HK2.**

447 **a)** Western blot analysis protein lysates of intestinal organoids raised from WT



448 and *Hk2*<sup>ΔIEC</sup> mice after stimulation with 100 ng/ml TNF for 24h. **b,c)** Metabolic  
449 analysis of WT and *Hk2*-deficient  $\Delta Hk2$  Caco-2 cells using the Seahorse XF  
450 analyzer. \*  $p < 0.01$  and \*\*\*\*  $p < 0.0001$  WT versus  $\Delta Hk2$  using two-way ANOVA.  
451 **b)** The extracellular acidification rate (ECAR) reflects the glycolytic flux (ns =  
452 non-significant). **c)** The oxygen consumption rate (OCR) indicates  
453 mitochondrial respiration, which was impaired due to loss of HK2. \*  $p < 0.05$ , \*\*\*\*  
454  $p < 0.0001$ . **d)** Epithelial *Ppif* expression was downregulated in *Hk2*<sup>ΔIEC</sup>  
455 compared to WT mice during the course of DSS-induced colitis (days 0, 3 and  
456 7) as determined by RNA sequencing (normalized read counts). \*\*  $p < 0.01$  WT  
457 versus *Hk2*<sup>ΔIEC</sup> using two-way ANOVA. **e)** Reduced *Ppif* expression as  
458 measured by qPCR in  $\Delta Hk2$  Caco-2 compared to WT cells upon 24h stimulation  
459 with TNF (100 ng/ml) and IL17A (50 ng/ml) or with IFN- $\beta$  (50 ng/ml) to induce  
460 inflammation. \*\*  $p < 0.01$  WT versus  $\Delta Hk2$  using two-way ANOVA.

461 **Figure 3: The microbial butyrate ameliorates colitis via HK2.** *Hk2*  
462 expression in crypts and tips of ileum and colon of **a)** germ-free (GF) and  
463 conventionally raised (CR) mice and **b)** during colonization of GF mice with a  
464 normal microbiota. \*\*\*\*  $p < 0.0001$  GF vs. CR using moderated t test with FDR  
465 correction. #  $p < 0.001$  GF vs. d1 or d3 or d5 or d7 using one-way ANOVA. **c)**  
466 *Hk2* expression in GF mice and those mono-colonized with the single bacteria  
467 *Bacteroides thetaiotaomicron* (Gram-), *Escherichia coli* (Gram-) or  
468 *Bifidobacterium longum* (Gram+) or the minimal microbiomes ASF (Altered  
469 Schaedler Flora) and OMM (Oligo-Mouse-Microbiota). \*  $p < 0.01$ , \*\*  $p < 0.01$  and  
470 \*\*\*\*  $p < 0.0001$  versus GF using one-way ANOVA. **d)** Relative *Hk2* expression  
471 in Caco-2 cells stimulated with sterile-filtered culture supernatants of the OMM  
472 species grown *in vitro*. The used strains were: *Acutalibacter muris* KB18,

473 *Akkermansia muciphila* YL44, *Bacteroides caecimuris* I48, *Bifidobacterium*  
474 *animalis* YL2, *Blautia coccoides* YL58, *Enterocloster clostridioforme* YL32,  
475 *Clostridium innocuum* I46, *Enterococcus faecalis* KB1, *Flavonifractor plautii*  
476 YL31, *Limosilactobacillus reuteri* I49, *Muribaculum intestinale* YL27. \*\* p<0.01  
477 and \*\*\* p<0.001 versus Medium using one-way ANOVA. **e)** Relative *Hk2*  
478 expression in Caco-2 cells stimulated with the microbial metabolites acetate  
479 and butyrate (10 mM each for 24h). \* p<0.01 versus PBS using one-way  
480 ANOVA. **f)** Relative *Ppif* expression in Caco-2 cells stimulated with butyrate.  
481 \*\*\*\* p<0.0001 versus PBS using one-way ANOVA. **g)** Feeding WT mice a  
482 butyrate-enriched diet reduced HK2 protein expression in colonic epithelium as  
483 measured by immunohistochemistry. \* p<0.01 versus CTRL diet using one-way  
484 ANOVA. **h-m)** Dietary supplementation of the microbial metabolite butyrate  
485 protected from colitis dependent on HK2. WT and *Hk2*<sup>ΔIEC</sup> mice were fed either  
486 an acetate-enriched, butyrate-enriched or control diet and were then orally  
487 administered DSS to induce colitis. **h)** Body weight development, **i)** DAI, **j)**  
488 serum KC/CXCL1 levels, **k)** TUNEL-positive cells per colon crypt, **l)** histological  
489 score of WT (upper panel) and *Hk2*<sup>ΔIEC</sup> (lower panel) mice. **m)** HK2 protein  
490 levels in colon epithelium of treated WT mice as per immunohistochemistry.  
491 Acetate stimulated whereas butyrate repressed HK2 expression. \* / # indicate  
492 statistical significance in Butyrate (\*) or Acetate (#) versus CTRL diet using two-  
493 way ANOVA in (**h-i**) and one-way ANOVA in (**j-m**).

## 494 **Methods**

495 **Animals.** All animal experiments were approved by the local animal safety  
496 review board of the federal ministry of Schleswig Holstein and conducted  
497 according to national and international laws and policies (V 312-72241.121-33  
498 (95-8/11) and V242-62324/2016 (97-8/16)). Specific-pathogen free (SPF)  
499 animals were housed in the Central Animal Facility (ZTH) of the University  
500 Hospital Schleswig Holstein (UKSH, Kiel, Germany). To create the Hk2<sup>ΔIEC</sup>  
501 mouse line, we crossed commercially available mice carrying a floxed *Hk2*  
502 allele (EMMA #02074, <sup>45</sup>) with mice expressing the CRE recombinase under  
503 the control of the *Villin* promoter. As controls we used littermate Hk2<sup>fl/fl</sup> mice,  
504 referred to as WT mice. All mice were kept under a 12-h light cycle and fed  
505 gamma-irradiated diet *ad libitum*. Mice were killed by cervical dislocation prior  
506 to removing tissues for histological and molecular analyses. For basal  
507 phenotyping we used 9 to 11 and 86 to 92 weeks old mice. For DSS-induced  
508 colitis we used 10 to 14 weeks old male mice. Both genotypes were co-housed  
509 throughout the entire experiment. To induce colitis, mice received 1,5% (w/v)  
510 dextran sodium sulfate in autoclaved tap water. For the SCFA intervention mice  
511 were fed either a control diet, a butyrate-enriched diet or an acetate-containing  
512 diet for ten days prior to inducing colitis by administering DSS. The SCFA  
513 supplementation was continued throughout the entire experiment. The  
514 butyrate-enriched diet consisted of control feed (V1534, ssniff) supplemented  
515 with 10% (w/w) of the butyrate-polymer tributyrin (Sigma Aldrich), as this  
516 ensures the release of butyrate in the colon after metabolization by the intestinal  
517 microbiota instead of its absorption in the proximal small intestine <sup>46,47</sup>. The  
518 acetate-enriched diet consisted of control feed but the drinking water was

519 replaced with autoclaved tap water supplemented with 150 mM sodium acetate  
520 (Sigma Aldrich), a concentration used successfully in previous studies <sup>26,36</sup>.  
521 Gnotobiotic experiments were performed in the animal facilities of either the  
522 Experimental Biomedicine (EBM) of Gothenburg or Hannover Medical School  
523 (MHH). All animal protocols were approved by the Gothenburg Animal Ethics  
524 Committee or by Lower Saxony State Office for Consumer Protection and Food  
525 Safety. Gnotobiotic mice were housed as described under standard procedures  
526 <sup>48,49</sup>. Mice were kept under a 12-h light cycle and fed autoclaved chow diet *ad*  
527 *libitum* (Labdiet, St Louis, MO, USA). Monoassociated mice were generated by  
528 inoculating 12-week-old GF mice with 200 µl of overnight (stationary phase) *in*  
529 *vitro* cultures of *B. thetaiotaomicron*, *E. coli* or *B. longum* by oral gavage and  
530 the mice were sacrificed 14 days post colonization. ASF- and OMM-associated  
531 mice were generated by co-housing of weaned germ-free mice for four weeks  
532 with gnotobiotic donor animals colonized with either ASF or OMM and sacrificed  
533 at an age of 12 weeks.

534 **Bacteria and *in vitro* culture.** *B. thetaiotaomicron* VPI-5482 (ATCC 29148, <sup>50</sup>),  
535 *E. coli* W3110 <sup>51</sup> were kindly provided by Dr. Jeffrey Gordon (Edison Family  
536 Center for Genome Sciences and Systems Biology, Washington University  
537 School of Medicine, St. Louis, MO 63110, USA), while *B. longum* NCC 2705  
538 was kindly provided by Dr. Stéphane Duboux, Nestlé Research Center,  
539 Lausanne, Switzerland. Liquid media (TYG, LB and MRS broth supplemented  
540 with 0.05% (w/v) cysteine, for *B. thetaiotaomicron*, *E. coli* and *B. longum*,  
541 respectively) were inoculated with single colonies of cultures on agar plates and  
542 were grown to the stationary phase overnight in an anaerobic jar at 37°C. ASF  
543 is a mix of eight bacteria: two Clostridia species ASF356 & ASF502,

544 *Lactobacillus murinus* ASF361 and spec. ASF360, *Mucispirillum schaedleri*  
545 ASF457, *Eubacterium plexicaudatum* ASF492, *Parabacteroides spec.* ASF519  
546 and an unknown Firmicutes bacterium ASF500<sup>52</sup>. ASF colonized mice were  
547 purchased from Taconic and inoculated transgenerally by co-housing. OMM  
548 (Oligo-Mouse-Microbiota) is a mix of 12 bacteria: *Bacterioides ceacimuris* I48,  
549 *Muribaculum intestinale* YL27, *Akkermansia municipihila* YL44, *Turicimonas*  
550 *muris* YL45, *Limosilactobacillus reuteri* I49, *Enterococcus faecalis* KB1, *Blautia*  
551 *coccoides* YL58, *Clostridium innocuum* I46, *Flavonifractor plautii* YL31,  
552 *Enterocloster clostridioforme* YL32, *Acutalibacter muris* KB18 and  
553 *Bifidobacterium animalis* YL2<sup>21</sup>. Bacteria of the OMM consortium were grown  
554 in single cultures under anaerobic conditions in Anaerobic Akkermansia  
555 Medium (AAM) as previously described<sup>21</sup>.

556 **Isolation of primary cells and intestinal organoids.** IECs were isolated from  
557 intestinal tissue using the Lamina Propria Dissociation Kit (Miltenyi BioTech,  
558 Bergisch Gladbach, Germany) according to the manufacturer's protocol with  
559 minor deviations as described before<sup>53</sup>. In brief, intestinal epithelial cells were  
560 isolated by disruption of the structural integrity of the epithelium using  
561 ethylenediaminetetraacetic acid (EDTA) and dithiothreitol (DTT). Purity of  
562 individual IEC fractions was analyzed by flow cytometry on a FACS Calibur flow  
563 cytometer (B&D, Heidelberg, Germany) with Cellquest analysis software from  
564 Becton Dickinson. We used the Anti-EpCam-PE (Clone: G8.8, Biolegend, San  
565 Diego, USA) antibody for analysis of IEC purity. FACS-data was analysed using  
566 Flowing Software (Perttu Terho, Turku Centre for Biotechnology, Finland).  
567 Intestinal organoids were generated following procedures described earlier by  
568 Sato et al., 2009<sup>54</sup>. Organoids were cultivated in ENR-conditioned medium

569 supplemented with human recombinant EGF as described by Sato et al., 2011  
570 <sup>55</sup>.

571 **Generation and culture of HK2-deficient Caco-2 cells.** A CRISPR plasmid  
572 targeting human *Hk2* was generated using the GeneArt<sup>®</sup> CRISPR Nuclease  
573 Vector Kit from Thermo Fisher. Caco-2 cells were purchased from DSMZ (ACC-  
574 169) and transfected with the *Hk2* CRISPR plasmid using Lipofectamin reagent  
575 kit (Thermo Fisher Scientific). Positive clones were screened via Western blot  
576 to generate a monoclonal population termed Caco-2<sup>ΔHk2</sup>. Caco-2 cells that were  
577 also subjected to the CRISPR transfection and selection procedure, but which  
578 still showed a HK2 band as per western blot analysis were used as controls  
579 (Caco-2<sup>WT</sup>). Caco-2<sup>WT</sup> and Caco-2<sup>ΔHk2</sup> cells were cultured in MEM with 20%  
580 (v/v) FCS purchased from Gibco/Life Technologies. Cells were seeded with  
581 70% confluency and 24 hours in advance of stimulation.

582 **RNA isolation and qPCR.** Total RNA was extracted using the RNeasy Mini Kit  
583 (Qiagen) according to the manufacturer's protocol. RNA concentration was  
584 measured using a NanoDrop ND-1000 spectrophotometer (PeqLab  
585 Biotechnologie). 1μg of total RNA was reverse-transcribed to cDNA using the  
586 Maxima H Minus First Strand cDNA Synthesis Kit (ThermoFisher Scientific).  
587 qPCR was carried out using SYBR Select Master Mix (Applied Biosystems)  
588 according to the manufacturer's instructions on a Viiia 7 Real-Time PCR System  
589 (ThermoFisher Scientific). Expression levels were normalized to *Actb* (β-actin  
590 or *Rpl32* (ribosomal protein L32). Primer sequences are listed in Extended data  
591 table 3.

592 **RNA sequencing.** Total RNA was extracted as described above from isolated  
593 IECs from *Hk2*<sup>ΔIEC</sup> and littermate control mice under untreated conditions and

594 after administering DSS for 3 or 7 days. RNA libraries were prepared using  
595 TruSeq stranded mRNA Kit (Illumina) according to manufacturer's instructions.  
596 All samples were sequenced using an Illumina NovaSeq 6000 sequencer  
597 (Illumina, San Diego, CA) with an average of 23 million paired-end reads (2x 50  
598 bp) at IKMB NGS core facilities. The RNA-seq data was processed using an in-  
599 house pipeline (<https://github.com/nf-core/rnaseq>). Briefly, adapters and low-  
600 quality bases from the RNA-seq reads were removed using Trim Galore  
601 (version 0.4.4). The filtered reads were mapped to the mouse genome  
602 (GRCm38) using STAR aligner (version 2.5.2b). Expression counts of the  
603 transcripts were estimated using featureCounts (version 1.5.2) and then  
604 normalized across samples using the DESeq normalization method. DESeq2<sup>56</sup>  
605 was used to determine differentially expressed genes. Genes were considered  
606 as significant differentially expressed if the adjusted *p-value* (Benjamini-  
607 Hochberg (BH) multiple test correction method) was less than 0.05. Gene  
608 Ontology (GO) enrichment analysis was conducted using the Bioconductor  
609 package topGO (version 2.32.0) and a Fisher.elim *p-value* (weight algorithm)  
610 of 0.05 was used as significance threshold.

611 **Microbiota analysis.** MiSeq 16S amplicon sequence data was analyzed using  
612 MacQIIME v1.9.1 (<http://www.wernerlab.org/software/macqiime>,<sup>57</sup>) as  
613 described previously<sup>58,59</sup>. Briefly, all sequencing reads were trimmed keeping  
614 only nucleotides with a Phred quality score of at least 20, then paired-end  
615 assembled and mapped onto the different samples using the barcode  
616 information. Sequences were assigned to operational taxonomic units (OTUs)  
617 using uclust and the greengenes reference database (gg\_13\_8 release) with  
618 97% identity<sup>60,61</sup>. Representative OTUs were picked and taxonomy assigned

619 using uclust and the greengenes database. Quality filtering was performed by  
620 removing chimeric sequences using ChimeraSlayer<sup>62</sup> and by removing  
621 singletons and sequences that failed to align with PyNAST<sup>63</sup>. The reference  
622 phylogenetic tree was constructed using FastTree 2<sup>64</sup>. All samples within a  
623 single analysis were normalized by rarefaction to the minimum shared read  
624 count to account for differential sequencing depth among samples (10,174  
625 sequences per sample). Relative abundance was calculated by dividing the  
626 number of reads for an OTU by the total number of sequences in the sample.  
627 Alpha diversity measures were computed and beta diversity was calculated  
628 using Unweighted Unifrac and visualized by principal coordinate analysis.  
629 Significance of differences in abundances of various taxonomic units between  
630 *Hk2<sup>ΔIEC</sup>* and littermate control mice was calculated using t-test and p values  
631 were adjusted for multiple testing using FDR correction (q-value).

632 **Western blot analyses.** Caco-2 cells were lysed using RIPA buffer. Organoids  
633 were lysed using SDS-based DLB buffer + 1% Halt Protease inhibitor cocktail  
634 (Thermo Fisher Scientific). Lysates were heated to 95°C for 5 min centrifuged  
635 at 16,000 g for 15 min at 4°C to remove cell remnants. Protein concentrations  
636 were measured by DC Protein Assay (BioRad) according to the manufacturers  
637 protocol. Equal amounts of lysates containing Laemmli buffer were heated at  
638 95°C and electrophoresed on 12% polyacrylamide gels under standard SDS-  
639 PAGE conditions before being transferred onto a polyvinylidene fluoride  
640 membranes (GE Healthcare). Protein loaded membranes were blocked with  
641 5% (w/v) non-fat dry milk or bovine serum albumin (BSA) in Tris-buffered saline  
642 (TBS) supplemented with 0,1% (v/v) Tween 20 for 1 hour, incubated with  
643 primary antibody (mouse anti-HK2, Novus Biologicals, #NBP2-02272; rabbit



644 anti-PARP1/cPARP1, Cell Signaling Technology, #9542; rabbit anti-  
645 Caspase3/cCaspase3, Cell Signaling Technology, #9662, mouse anti-  
646 betaActin, Abcam, #ab20272) overnight, washed three times with TBS-Tween-  
647 20 and then incubated with the secondary horseradish peroxidase (HRP)-  
648 conjugated antibody for 1 hour at room temperature. Proteins were detected  
649 using the Pierce ECL and ECL Plus Substrate Kits (ThermoFisher).

650 **Histology and immunostaining.** Tissue specimen were fixed in 10% formalin  
651 solution over night at 4°C and then embedded in paraffin. 5 µm thick sections  
652 were cut and stained with hematoxylin and eosin (H&E) or subjected to  
653 immunostaining using the Vectastain ABC kit (Vector Laboratories) including  
654 antigen retrieval in boiling citrate buffer. Primary antibodies were incubated  
655 overnight. For immunostaining of HK2 we used a 1:1000 diluted antibody  
656 (Novus Biologicals, #NBP2-02272). For immunostaining of Ki67 we used a  
657 1:500 diluted mouse anti-Ki67 antibody (BD Biosciences, cat.no. 556003). The  
658 TUNEL assay was performed using the ApopTag Plus Peroxidase In Situ  
659 Apoptosis Detection Kit (Merck Millipore) according to the manufacturer's  
660 instructions. Slides were visualized using a Zeiss Imager Z1 microscope (Zeiss)  
661 and pictures were taken using ZEN pro (Zeiss) software.

662 **Seahorse analysis.** To perform real-time ECAR and OCR-analyses, Caco-2  
663 cells were analyzed using the Seahorse XF24 Analyzer from Agilent  
664 Technologies by Mito Stress Test Kit or Glycolysis Stress Test Kit according to  
665 the manufacturer's instructions.  $4 \times 10^4$  cells were used in each assay with n=9  
666 replicates in three independent experiments.

667 **Metabolic modelling of SCFA production by OMM bacteria.** Metabolic  
668 networks were reconstructed using gapseq<sup>65</sup> based on the genomes of OMM

669 bacteria, which were downloaded from NCBI bioproject PRJNA289613, and the  
670 Anaerobic Akkermansia Medium <sup>21</sup>. The formation of fermentation products  
671 was determined via an extended flux balance analysis that minimizes the total  
672 flux through all reactions as a proxy for the parsimonious enzyme usage <sup>66</sup>. The  
673 variability of predictions was taken into account by randomly sampling the  
674 space of alternative optimal solutions via the function ACHR from the R  
675 package `sybilcycleFreeFlux` ( $W=5000$ ,  $nPoints=10000$ ) <sup>67</sup> to derive the  
676 distribution of fermentation products for each bacteria. All predicted  
677 fermentation products were then used as explanatory variables to estimate the  
678 *Hk2* expression via linear regression.

679 **Quantification of SCFAs.** OMM bacteria were grown as described and 1 mL  
680 of each bacterial culture supernatant was homogenized using NucleoSpin Bead  
681 Tubes (Macherey-Nagel, Düren, Germany) and a Precellys Evolution  
682 Homogenizer (Bertin Corp., Rockville, Maryland, USA). Homogenates were  
683 cleared by centrifugation for 10 min at  $21,000 \times g$  and  $4^{\circ}\text{C}$ . SCFA standards  
684 including acetic, propionic and butyric acid (purchased from Sigma Aldrich, St  
685 Louis, MO, USA) were prepared in methanol to a concentration of 100 ppm.  
686 Derivatization of SCFAs was performed with 3-nitrophenylhydrazone as  
687 described <sup>68</sup>. SCFA concentrations in the samples were then measured via  
688 Ultra-High Performance Liquid Chromatography (Acquity UPLC, Waters,  
689 Milford, MA, USA) coupled to Mass Spectrometry (amaZon ETD IonTrap,  
690 Bruker Daltonics GmbH, Bremen, Germany). Sample separation was  
691 performed using a C8 column and solvent system consisting of ammonium  
692 acetate (5 mM, Sigma Aldrich, St Louis, MO, USA) combined with acetic acid  
693 (0.1%, pH 4.2, Biosolve, Valkenswaard, Netherlands) in water or acetonitrile

694 (LC-MS CHROMASOLV, FLUKA, Sigma Aldrich, St Louis, MO, USA). Mass  
695 spectrometry analysis was performed in negative electrospray ionization mode.  
696 Peak areas and concentrations of SCFAs in the bacterial supernatants were  
697 calculated using QuantAnalysis (Bruker, Daltonics, Bremen, Germany)  
698 software.

699 **Statistical analysis.** Biostatistical analyses were performed using GraphPad  
700 Prism (version 8) software (GraphPad, Inc, La Jolla, CA), MacQIIME v1.9.2 or  
701 R (v 3.2.5). Specific comparisons and analyses are described in the individual  
702 method sections. Differences between the groups were considered significant  
703 at  $P < 0.05$  and the data are presented as means  $\pm$  SEM.

704 **Data Availability Statement.** All data is either included in this manuscript or  
705 deposited on public databases. The RNA sequencing data has been deposited  
706 at NCBI's Sequence Read Archive under the accession number GSE158026.  
707 The 16S amplicon sequencing data are accessible through the European  
708 Nucleotide Archive (ENA, <https://www.ebi.ac.uk/ena>) under the study  
709 accession number PRJEB40281. Additional data that support the findings of  
710 this study are available from the corresponding author upon reasonable  
711 request.

712 **Code Availability Statement.** All codes used to generate the bioinformatic  
713 analyses are available from the corresponding author upon reasonable request.

714

## 715 **References (methods)**

- 716 45 Heikkinen, S. *et al.* Hexokinase II-deficient mice. Prenatal death of  
717 homozygotes without disturbances in glucose tolerance in heterozygotes. *J Biol*  
718 *Chem* **274**, 22517-22523, doi:10.1074/jbc.274.32.22517 (1999).
- 719 46 Wichmann, A. *et al.* Microbial modulation of energy availability in the colon  
720 regulates intestinal transit. *Cell Host Microbe* **14**, 582-590,  
721 doi:10.1016/j.chom.2013.09.012 (2013).
- 722 47 Egorin, M. J., Yuan, Z. M., Sentz, D. L., Plaisance, K. & Eiseman, J. L. Plasma  
723 pharmacokinetics of butyrate after intravenous administration of sodium  
724 butyrate or oral administration of tributyrin or sodium butyrate to mice and rats.  
725 *Cancer Chemother Pharmacol* **43**, 445-453, doi:10.1007/s002800050922  
726 (1999).
- 727 48 Sommer, F. *et al.* Altered Mucus Glycosylation in Core 1 O-Glycan-Deficient  
728 Mice Affects Microbiota Composition and Intestinal Architecture. *PLoS One* **9**,  
729 e85254 (2014).
- 730 49 Bolsega, S. *et al.* Composition of the Intestinal Microbiota Determines the  
731 Outcome of Virus-Triggered Colitis in Mice. *Front Immunol* **10**, 1708,  
732 doi:10.3389/fimmu.2019.01708 (2019).
- 733 50 Goodman, A. L. *et al.* Identifying genetic determinants needed to establish a  
734 human gut symbiont in its habitat. *Cell Host Microbe* **6**, 279-289,  
735 doi:10.1016/j.chom.2009.08.003 (2009).
- 736 51 Karow, M. & Georgopoulos, C. Isolation and characterization of the  
737 *Escherichia coli* msbB gene, a multicopy suppressor of null mutations in the  
738 high-temperature requirement gene htrB. *Journal of bacteriology* **174**, 702-710,  
739 doi:10.1128/jb.174.3.702-710.1992 (1992).
- 740 52 Schaedler, R. W., Dubos, R. & Costello, R. The Development of the Bacterial  
741 Flora in the Gastrointestinal Tract of Mice. *J Exp Med* **122**, 59-66 (1965).
- 742 53 Pan, W. H. *et al.* Exposure to the gut microbiota drives distinct methylome and  
743 transcriptome changes in intestinal epithelial cells during postnatal  
744 development. *Genome Med* **10**, 27, doi:10.1186/s13073-018-0534-5 (2018).
- 745 54 Sato, T. *et al.* Single Lgr5 stem cells build crypt-villus structures in vitro without  
746 a mesenchymal niche. *Nature* **459**, 262-265, doi:10.1038/nature07935 (2009).
- 747 55 Sato, T. *et al.* Long-term expansion of epithelial organoids from human colon,  
748 adenoma, adenocarcinoma, and Barrett's epithelium. *Gastroenterology* **141**,  
749 1762-1772, doi:10.1053/j.gastro.2011.07.050 (2011).
- 750 56 Love, M. I., Huber, W. & Anders, S. Moderated estimation of fold change and  
751 dispersion for RNA-seq data with DESeq2. *Genome biology* **15**, 550,  
752 doi:10.1186/PREACCEPT-8897612761307401 (2014).
- 753 57 Caporaso, J. G. *et al.* QIIME allows analysis of high-throughput community  
754 sequencing data. *Nat Methods* **7**, 335-336, doi:10.1038/nmeth.f.303 (2010).
- 755 58 Sommer, F. *et al.* The Gut Microbiota Modulates Energy Metabolism in the  
756 Hibernating Brown Bear *Ursus arctos*. *Cell Reports* **14**, 1655-1661,  
757 doi:10.1016/j.celrep.2016.01.026 (2016).
- 758 59 Fulde, M. *et al.* Neonatal selection by Toll-like receptor 5 influences long-term  
759 gut microbiota composition. *Nature*, doi:10.1038/s41586-018-0395-5 (2018).
- 760 60 Edgar, R. C. Search and clustering orders of magnitude faster than BLAST.  
761 *Bioinformatics* **26**, 2460-2461, doi:10.1093/bioinformatics/btq461 (2010).

- 762 61 DeSantis, T. Z. *et al.* Greengenes, a chimera-checked 16S rRNA gene database  
763 and workbench compatible with ARB. *Appl Environ Microbiol* **72**, 5069-5072,  
764 doi:10.1128/AEM.03006-05 (2006).
- 765 62 Haas, B. J. *et al.* Chimeric 16S rRNA sequence formation and detection in  
766 Sanger and 454-pyrosequenced PCR amplicons. *Genome Res* **21**, 494-504,  
767 doi:10.1101/gr.112730.110 (2011).
- 768 63 Caporaso, J. G. *et al.* PyNAST: a flexible tool for aligning sequences to a  
769 template alignment. *Bioinformatics* **26**, 266-267,  
770 doi:10.1093/bioinformatics/btp636 (2010).
- 771 64 Price, M. N., Dehal, P. S. & Arkin, A. P. FastTree 2--approximately maximum-  
772 likelihood trees for large alignments. *PLoS One* **5**, e9490,  
773 doi:10.1371/journal.pone.0009490 (2010).
- 774 65 Zimmermann, J., Kaleta, C. & Waschina, S. gapseq: Informed prediction of  
775 bacterial metabolic pathways and reconstruction of accurate metabolic models.  
776 *bioRxiv*, 2020.2003.2020.000737, doi:10.1101/2020.03.20.000737 (2020).
- 777 66 Lewis, N. E. *et al.* Omic data from evolved E. coli are consistent with computed  
778 optimal growth from genome-scale models. *Mol Syst Biol* **6**, 390,  
779 doi:10.1038/msb.2010.47 (2010).
- 780 67 Desouki, A. A., Jarre, F., Gelius-Dietrich, G. & Lercher, M. J. CycleFreeFlux:  
781 efficient removal of thermodynamically infeasible loops from flux distributions.  
782 *Bioinformatics* **31**, 2159-2165, doi:10.1093/bioinformatics/btv096 (2015).
- 783 68 Liebisch, G. *et al.* Quantification of Fecal Short Chain Fatty Acids by Liquid  
784 Chromatography Tandem Mass Spectrometry-Investigation of Pre-Analytic  
785 Stability. *Biomolecules* **9**, doi:10.3390/biom9040121 (2019).
- 786

787

788

789 **Acknowledgments:**

790 The authors thank Karina Greve, Dorina Oelsner, Melanie Vollstedt, Maren  
791 Reffelmann, Melanie Nebendahl, Sabine Kock and Stefanie Baumgarten for  
792 excellent technical assistance. We also thank Dr. Filipe de Vadder (Lyon  
793 University, France) for critical comments that greatly improved the manuscript.

794 This work was supported by the German Research Foundation (DFG) through  
795 the individual grant SO1141/10-1, the Research Unit FOR5042 “miTarget - The  
796 Microbiome as a Target in Inflammatory Bowel Diseases” (project P5), the  
797 Collaborative Research Centre CRC1182 “Origin and Function of  
798 Metaorganisms” (project C2), the Excellence Clusters EXS2167 “Precision  
799 Medicine in Chronic Inflammation” and EXC306 “Inflammation at Interfaces”  
800 and via the SH Excellence Chair Program to Philip Rosenstiel.

801

802 **Author contributions**

803 JH, FH, LS, PR and FS designed research. JH, FH, LS, NS and FS managed  
804 the conventional mouse colony, monitored the mice, performed animal experi-  
805 ments and collected samples. MB, VT, FB maintained the gnotobiotic mouse  
806 facilities, performed the colonizations of GF mice with single bacteria and min-  
807 imal consortia and provided samples. JH, FH, LS, AW, KS, NS, KK, DP, SK  
808 and PR conducted the wet lab experiments. JH, FH, LS, NM, KS, NS, KK, RH,  
809 SK, FB, PR and FS analyzed and interpreted the data. JH, NM, AW, JZ, RH  
810 and FS performed the bioinformatics analyses. JH, FH, LS and FS prepared  
811 the figures. PR and FS obtained funding. JH, FH, LS, PR and FS co-wrote the  
812 manuscript with critical input from all authors.

813

814 **Competing interest declaration**

815 The authors have no competing interests to declare. All authors have read and  
816 approved the manuscript and agree with its submission. The manuscript has  
817 not been previously published and is not currently under consideration by  
818 another journal.

819



820 **Additional information**

821

822 **Abbreviations:**

823 ASF, altered Schaedler Flora; BSA, bovine serum albumin; Caco-2, colon car-  
824 cinoma cell line 2; CD, Crohn's disease; CR, conventionally raised mice; DAI,  
825 disease activity index; DSS, dextran sodium sulfate; ECAR, extracellular acidi-  
826 fication rate; EWAT, epididymal white adipose tissue; FCCP, cyanide-4-(trifluo-  
827 romethoxy)-phenylhydrazone; FFAR, free fatty-acid receptor; GF, germ-free;  
828 GO, gene ontology; GPR, G protein-coupled receptor; H&E, hematoxylin and  
829 eosin; HDAC, histone deacetylases; HK, hexokinase; HRP, horseradish perox-  
830 idase; IBD, inflammatory bowel disease; IEC, intestinal epithelial cell; MPTP,  
831 mitochondrial permeability transition pore; OCR, oxygen consumption rate;  
832 OMM, oligo Mouse Microbiota; PARP1, Poly(ADP-Ribose)-Polymerase 1;  
833 PPIF, peptidyl-prolyl cis-trans isomerase; qPCR, quantitative real-time poly-  
834 merase chain reaction; SCFA, short-chain fatty acid; SPF, specific pathogen  
835 free.; TBS, Tris-buffered saline; TNF, tumor necrosis factor; TUNEL, terminal  
836 deoxynucleotidyl transferase dUTP nick end labelling; UC, ulcerative colitis;  
837 WT, wild-type

838

839

840 **Extended data figure/table legends**

841 **Extended data figure 1: *Hk2*<sup>ΔIEC</sup> mice do not display an evident**

842 **immunological or metabolic phenotype under baseline conditions. a-g)**

843 10- or 90-week-old WT and *Hk2*<sup>ΔIEC</sup> mice were sacrificed and organ measures

844 taken. **a)** Body weight. **b)** Cecum weight. **c)** Liver weight. **d)** Spleen weight. **e)**

845 Epididymal white adipose tissue (EWAT) weight. **f)** Small intestine length. **g)**

846 Colon length. **h)** Relative expression of all hexokinase family members in

847 unfractionated colon tissue of 10-week-old WT and *Hk2*<sup>ΔIEC</sup> mice as per qPCR.

848 **i)** Intestinal permeability as measured by fluorescein isothiocyanate (FITC)

849 levels in blood of 10-week-old WT and *Hk2*<sup>ΔIEC</sup> mice 1h after oral gavage. **j)**

850 Blood glucose levels during oral glucose tolerance test in 10-week-old WT and

851 *Hk2*<sup>ΔIEC</sup> mice. **k)** Colonic histological score of 10-week-old WT and *Hk2*<sup>ΔIEC</sup>

852 mice. **l)** TUNEL-positive cells per colon crypt of 10-week-old WT and *Hk2*<sup>ΔIEC</sup>

853 mice. **m)** Ki-67-positive cells per colon crypt of 10-week-old WT and *Hk2*<sup>ΔIEC</sup>

854 mice including representative images. The scale bar represents 50 μm.

855 **Extended data figure 2: Phenotyping of WT and *Hk2*<sup>ΔIEC</sup> mice during DSS-**

856 **induced colitis. a-h)** Organ and histological data from WT and *Hk2*<sup>ΔIEC</sup> mice

857 sacrificed at the end (day 10) of DSS colitis. **a)** Cecum weight. **b)** Liver weight.

858 **c)** Spleen weight. **d)** Epididymal white adipose tissue (EWAT) weight. **e)** Small

859 intestine length. **f)** Colon length. **g)** TUNEL-positive cells per colon crypt. **h)** Ki-

860 67-positive cells per colon crypt. **i)** HK2 protein levels in colon epithelium of WT

861 mice at baseline (day 0) and at day 10 during DSS colitis as determined per

862 immunohistochemistry. **j)** Ki-67-positive cells per colon crypt and **k)** histological

863 score of WT and *Hk2*<sup>ΔIEC</sup> mice at day 3 and 7 during DSS colitis.

864 **Extended data figure 3: Heatmap of genes differentially expressed in**  
865 **colon of WT and *Hk2*<sup>ΔIEC</sup> mice at days 0, 3 and 7 during DSS colitis.** WT  
866 and *Hk2*<sup>ΔIEC</sup> mice were given 2% DSS in drinking water and analyzed on day 0,  
867 3 and 7 of treatment. RNA was isolated from unfractionated colon and  
868 sequenced to identify transcripts with differential expression dependent on the  
869 loss of epithelial HK2 during the onset of inflammation.

870 **Extended data Figure 4: Expression pattern of the HK2 protein in the**  
871 **colonic epithelium of untreated 10-week-old WT and *Hk2*<sup>ΔIEC</sup> mice.** The  
872 scale bar represents 50 μm. The dotted line indicates the tip epithelium area  
873 used for quantification of HK2 protein expression. Note the dominant HK2  
874 expression in the colonic tip epithelium.

875 **Extended data Figure 5: Ablation of HK2 in IECs does not alter the**  
876 **composition of the intestinal microbiota. a)** Principal coordinate analysis of  
877 fecal microbiota from WT and *Hk2*<sup>ΔIEC</sup> mice. **b)** Taxonomic overview on genus  
878 level. **c)** Alpha diversity (the variation of microorganisms in a single sample).

879 **Extended data Figure 6: Role of SCFAs and HDACs in butyrate-mediated**  
880 **repression of *Hk2* expression. a)** Metabolic modeling of the production of  
881 acetate, butyrate and propionate by the individual OMM bacteria based on their  
882 published genome information and the used *in-vitro* growth conditions, and  
883 correlation of metabolite production with *Hk2* expression. R denotes the  
884 Pearson correlation coefficient. **b)** Prediction of linear models incorporating the  
885 acetate, butyrate and propionate levels to explain the observed changes in *Hk2*  
886 expression upon stimulation of Caco-2 cells with the bacterial culture  
887 supernatants (shown in Fig. 3d). **c)** SCFA levels quantified in culture  
888 supernatants of single OMM bacteria, which were used to stimulate Caco-2

889 cells (shown in Fig. 3d). **d)** Relative *Hk2* expression in Caco-2 cells after  
890 transfection with a mix of siRNA targeting the three G protein-coupled receptors  
891 (GPR) GPR41 (*Ffar3*), GPR43 (*Ffar2*) and GPR109a (*Hca2*) and subsequent  
892 stimulation with butyrate. **e)** Expression of *Ffar3*, *Ffar2* and *Hcar2* in Caco-2  
893 cells after transfection with the siRNA targeting these three GPRs to test for  
894 successful knockdown. **f)** Relative *Hk2* expression in Caco-2 cells first treated  
895 with general or specific HDAC inhibitors and then incubated with butyrate.  
896 HDACi refers to a mixture of SAHA and NAM and was used to inhibit all HDAC  
897 classes. A mixture of PCI-34051 and TC-H106 were used to inhibit class I  
898 HDACs. TMP269, NAM (nicotinamide) and SIS17 were used to inhibit class II,  
899 III and IV, respectively. Valproic acid (VPA) and PCI-34051 were used to inhibit  
900 only HDAC1 and HDAC8, respectively. All expression values were normalized  
901 to the mean of DMSO-PBS.

902 **Extended data figure 7: Organ measures and histological data of WT and**  
903 ***Hk2*<sup>ΔIEC</sup> mice at the end of the dietary SCFA supplementation and DSS-**  
904 **induced colitis experiment. a)** Cecum weight. **b)** Liver weight. **c)** Spleen  
905 weight. **d)** Epididymal white adipose tissue (EWAT) weight. **e)** Small intestine  
906 length. **f)** Colon length. **g)** Ki-67-positive cells per colon crypt.

907 **Extended data table 1: Complete normalized read counts and statistics**  
908 **from RNA sequencing of IECs isolated from colon of WT and *Hk2*<sup>ΔIEC</sup>**  
909 **mice at day 0 (baseline) and days 3 and 7 of DSS colitis.**

910 **Extended data table 2: Statistics of linear modelling of *Hk2* expression**  
911 **induced by metabolites produced by single OMM bacteria grown *in vitro*.**

912 AIC = Akaike Information Criteria. Sigma = standard deviation of the residuals.

913 R<sup>2</sup> = coefficient of determination, referring to the proportion of variance in the

914 dependent variable that is predictable from independent variables. R = Pearson  
915 correlation coefficient of predicted metabolite production with *Hk2* expression  
916 data.

917 **Extended data table 3: List of primers used in this study.**

918

919

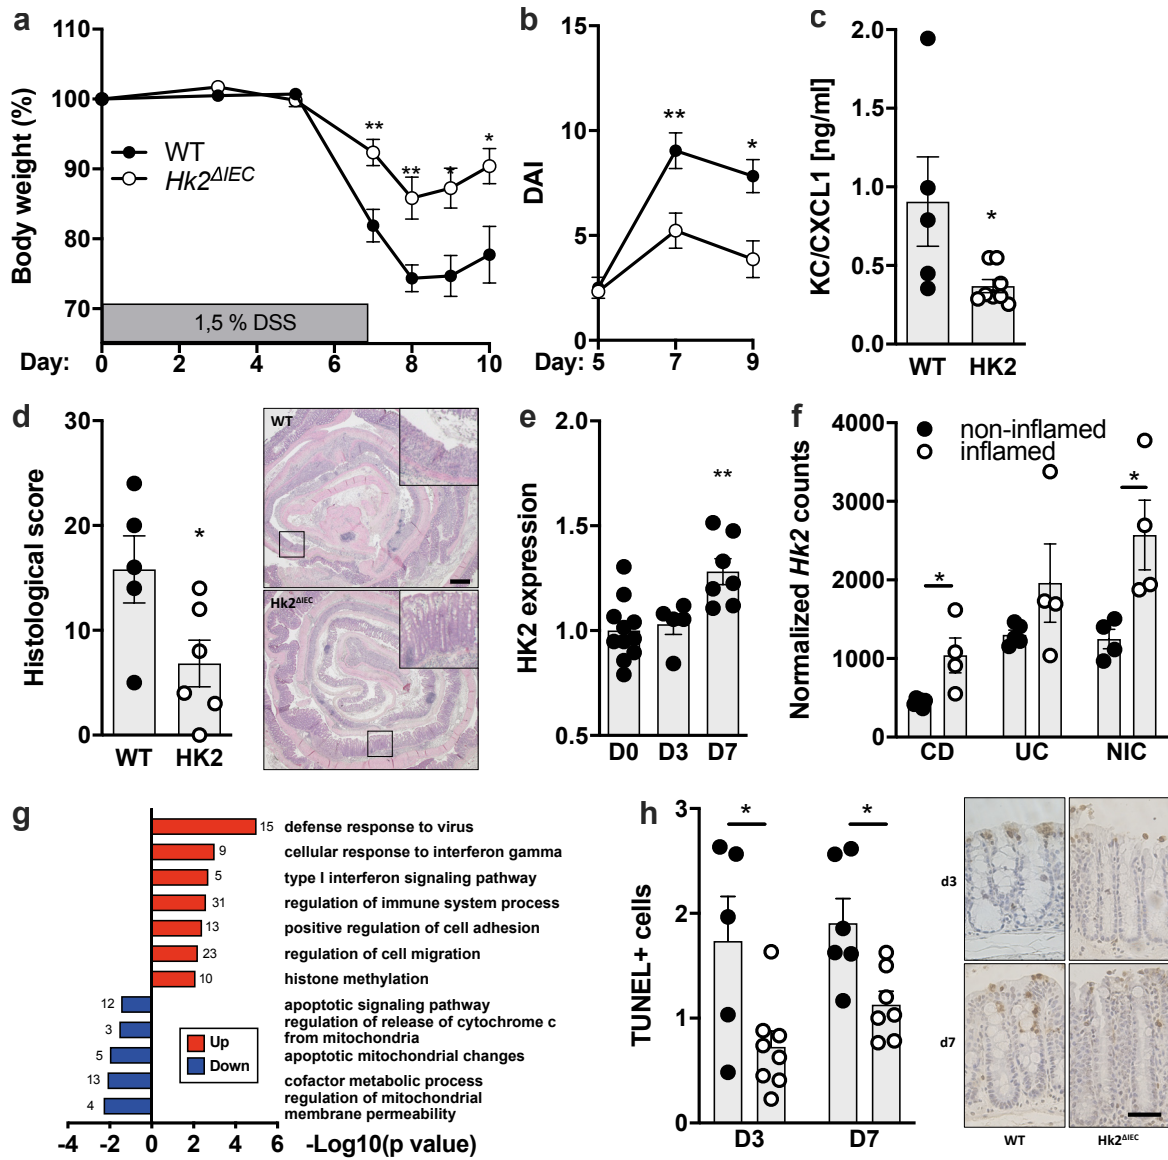

Fig.1

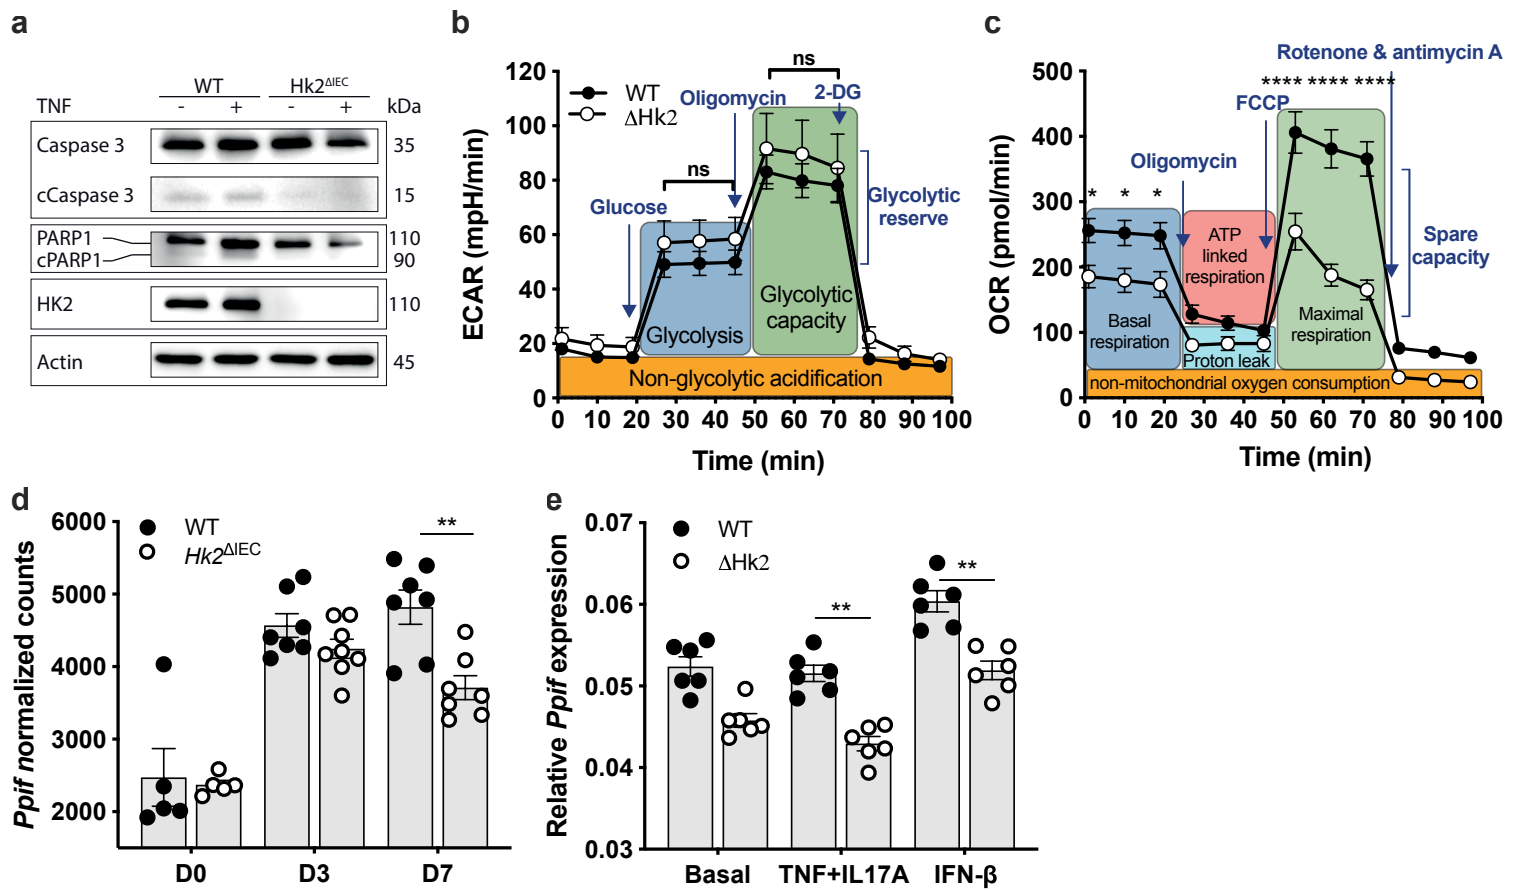

Fig.2

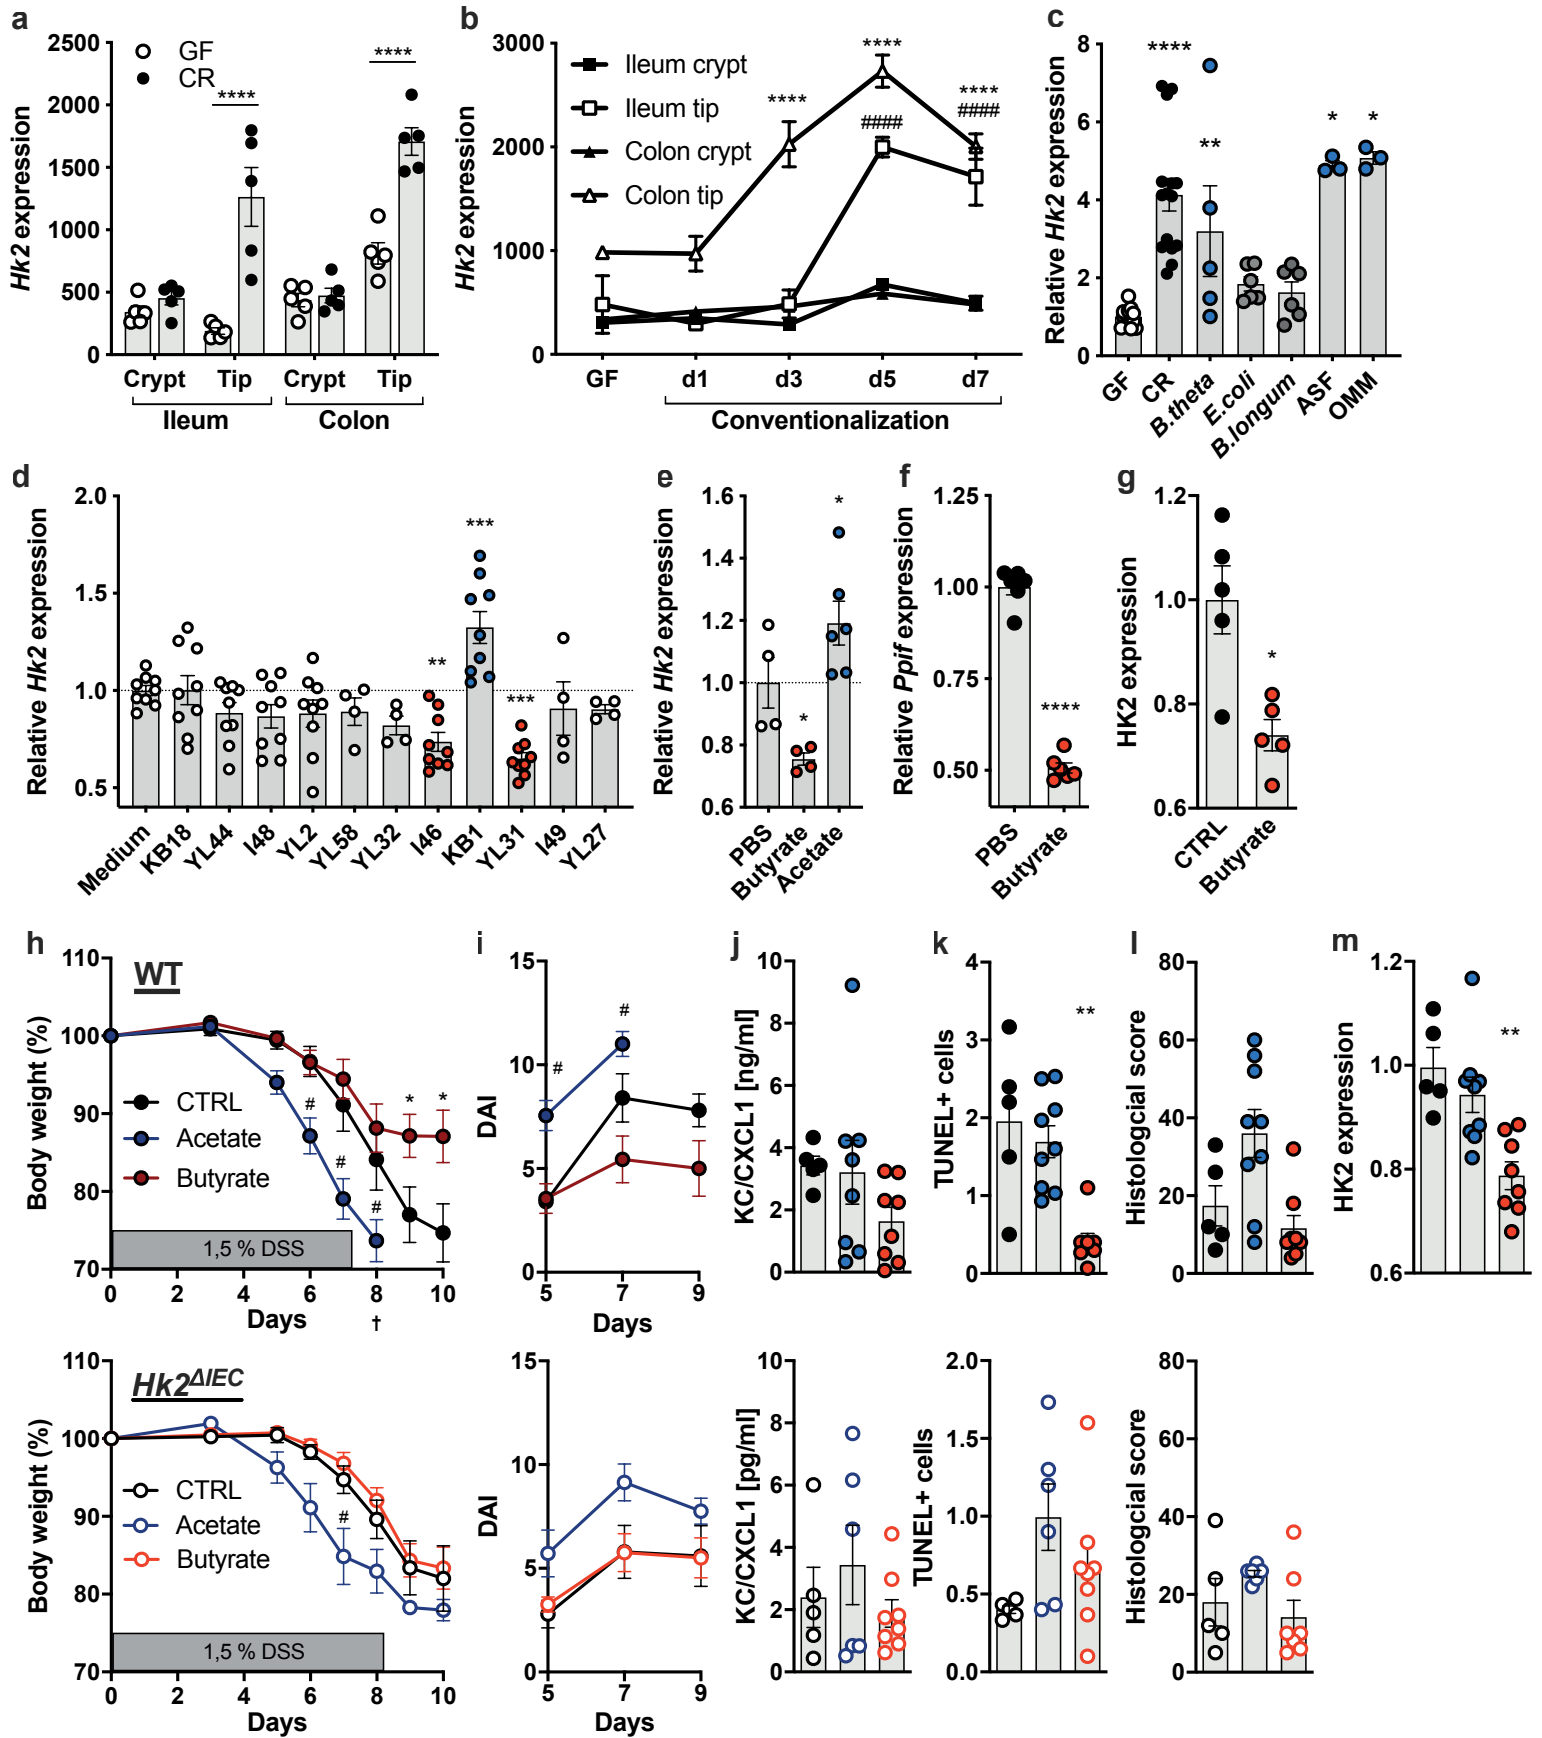

Fig.3



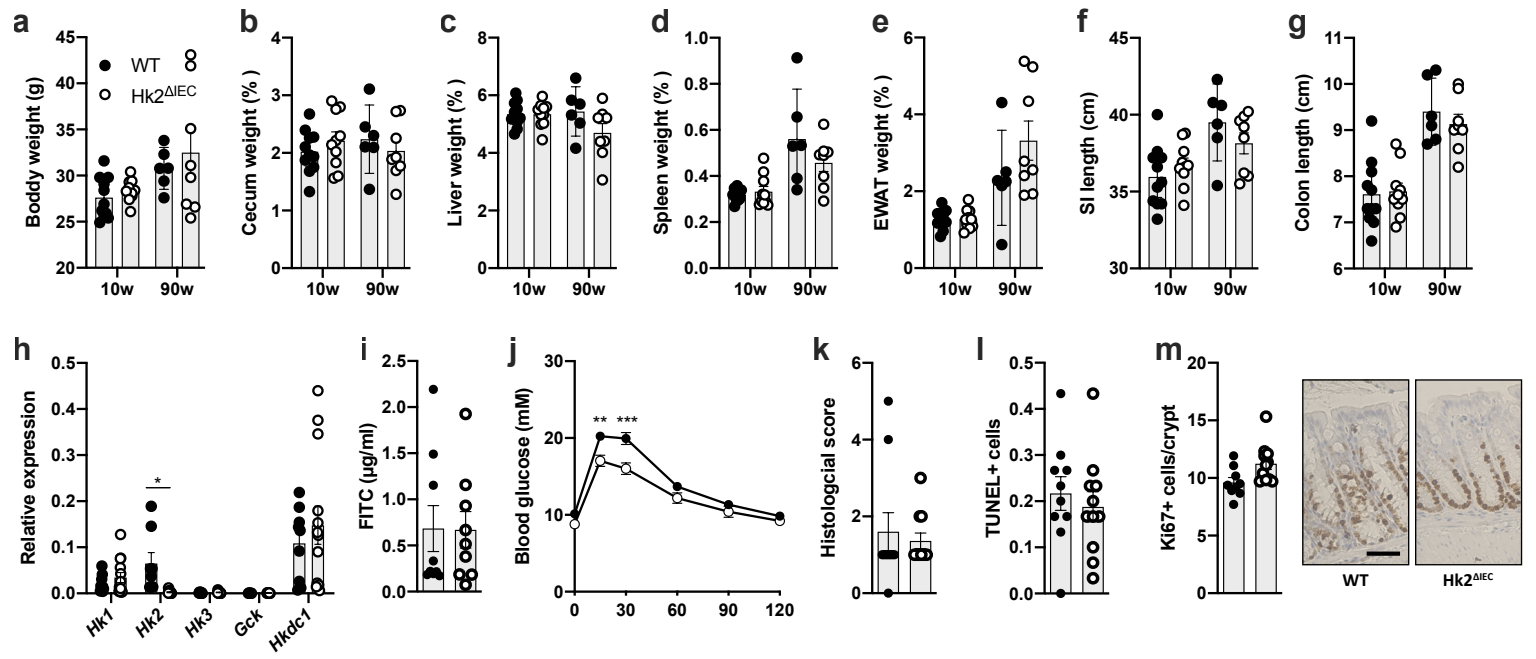

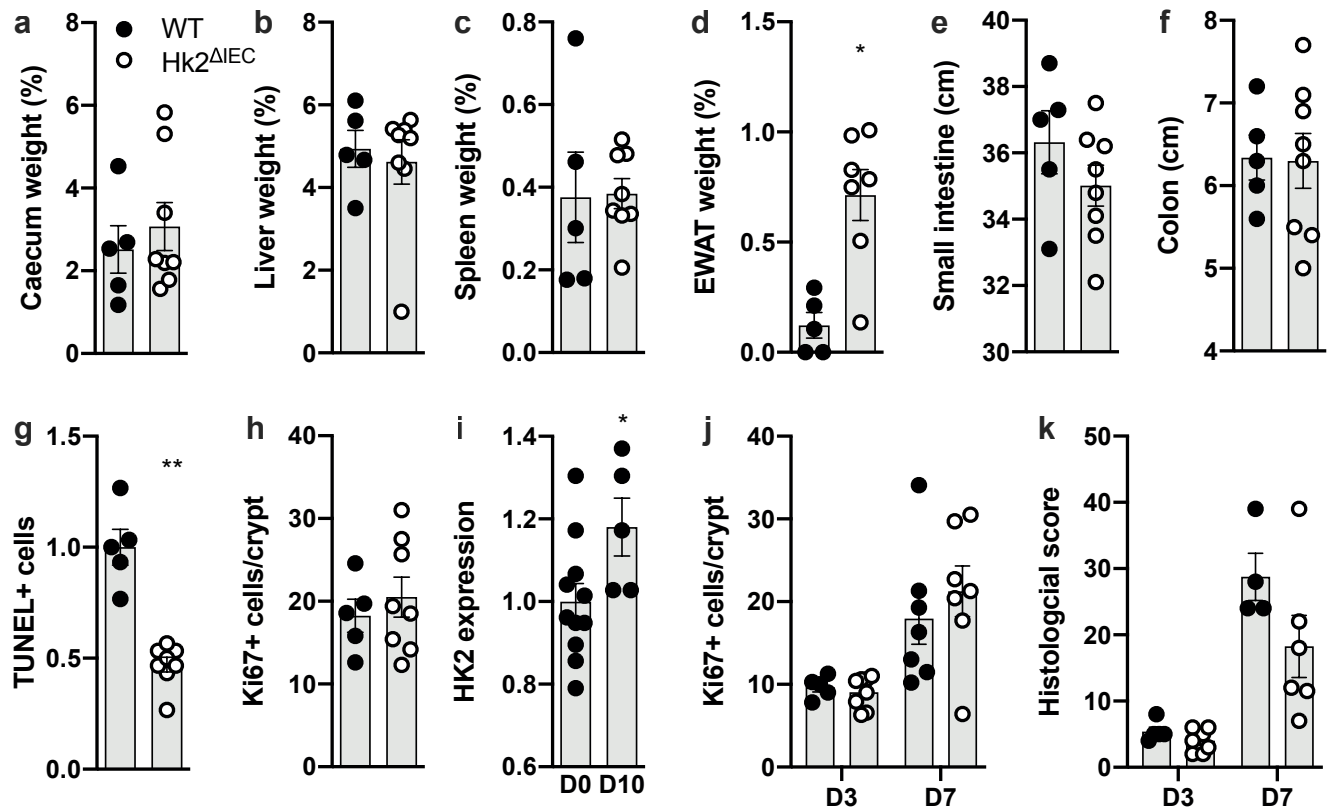

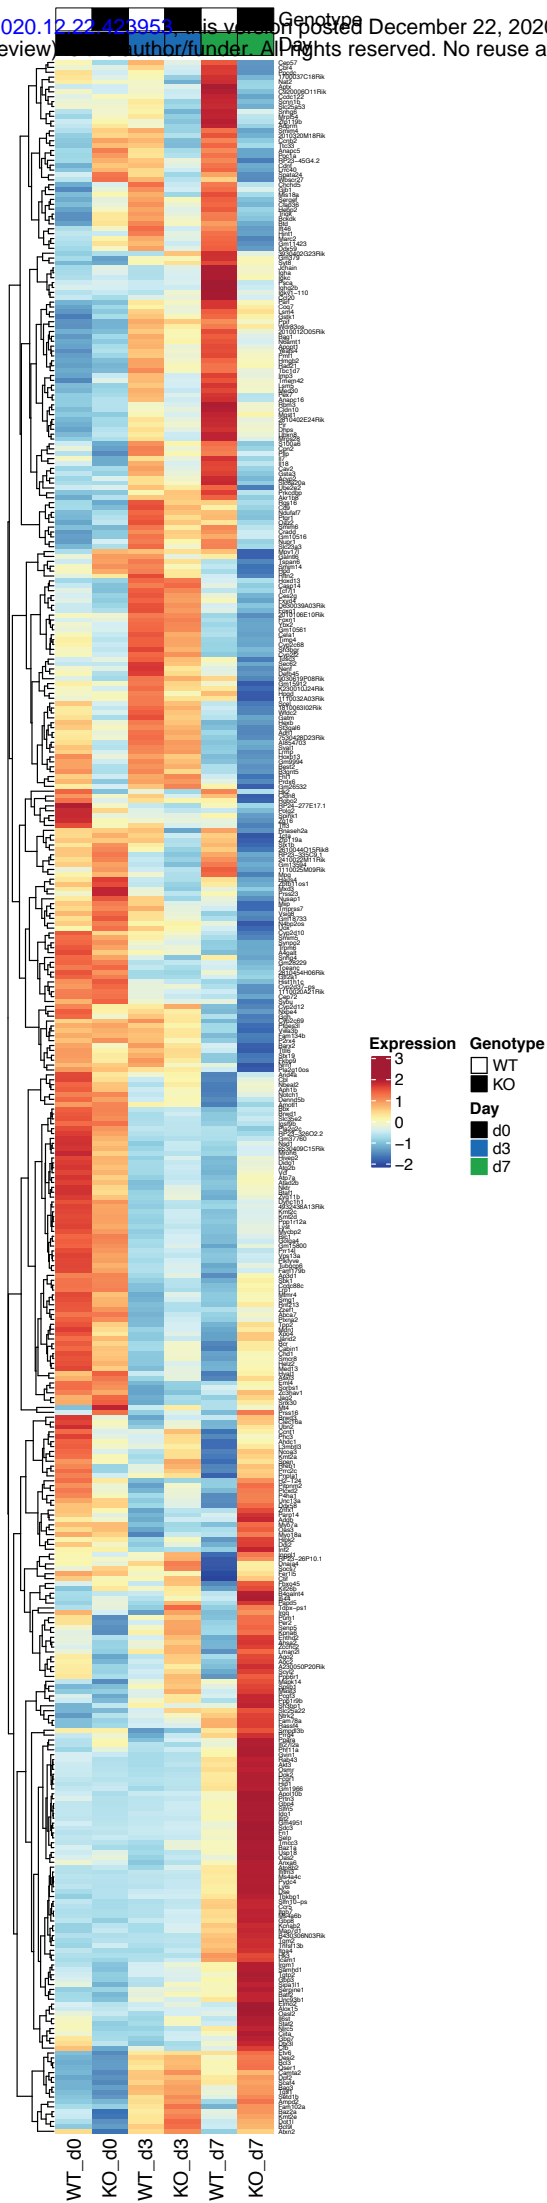

Fig.S3

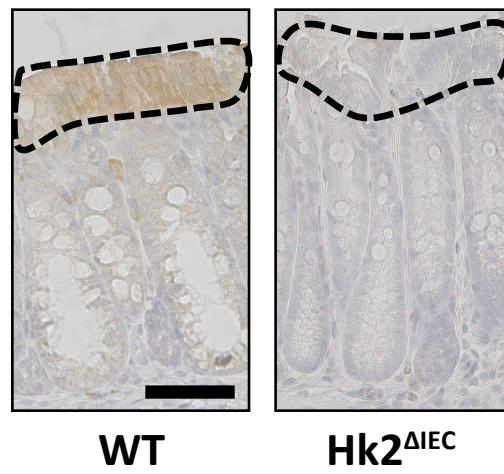

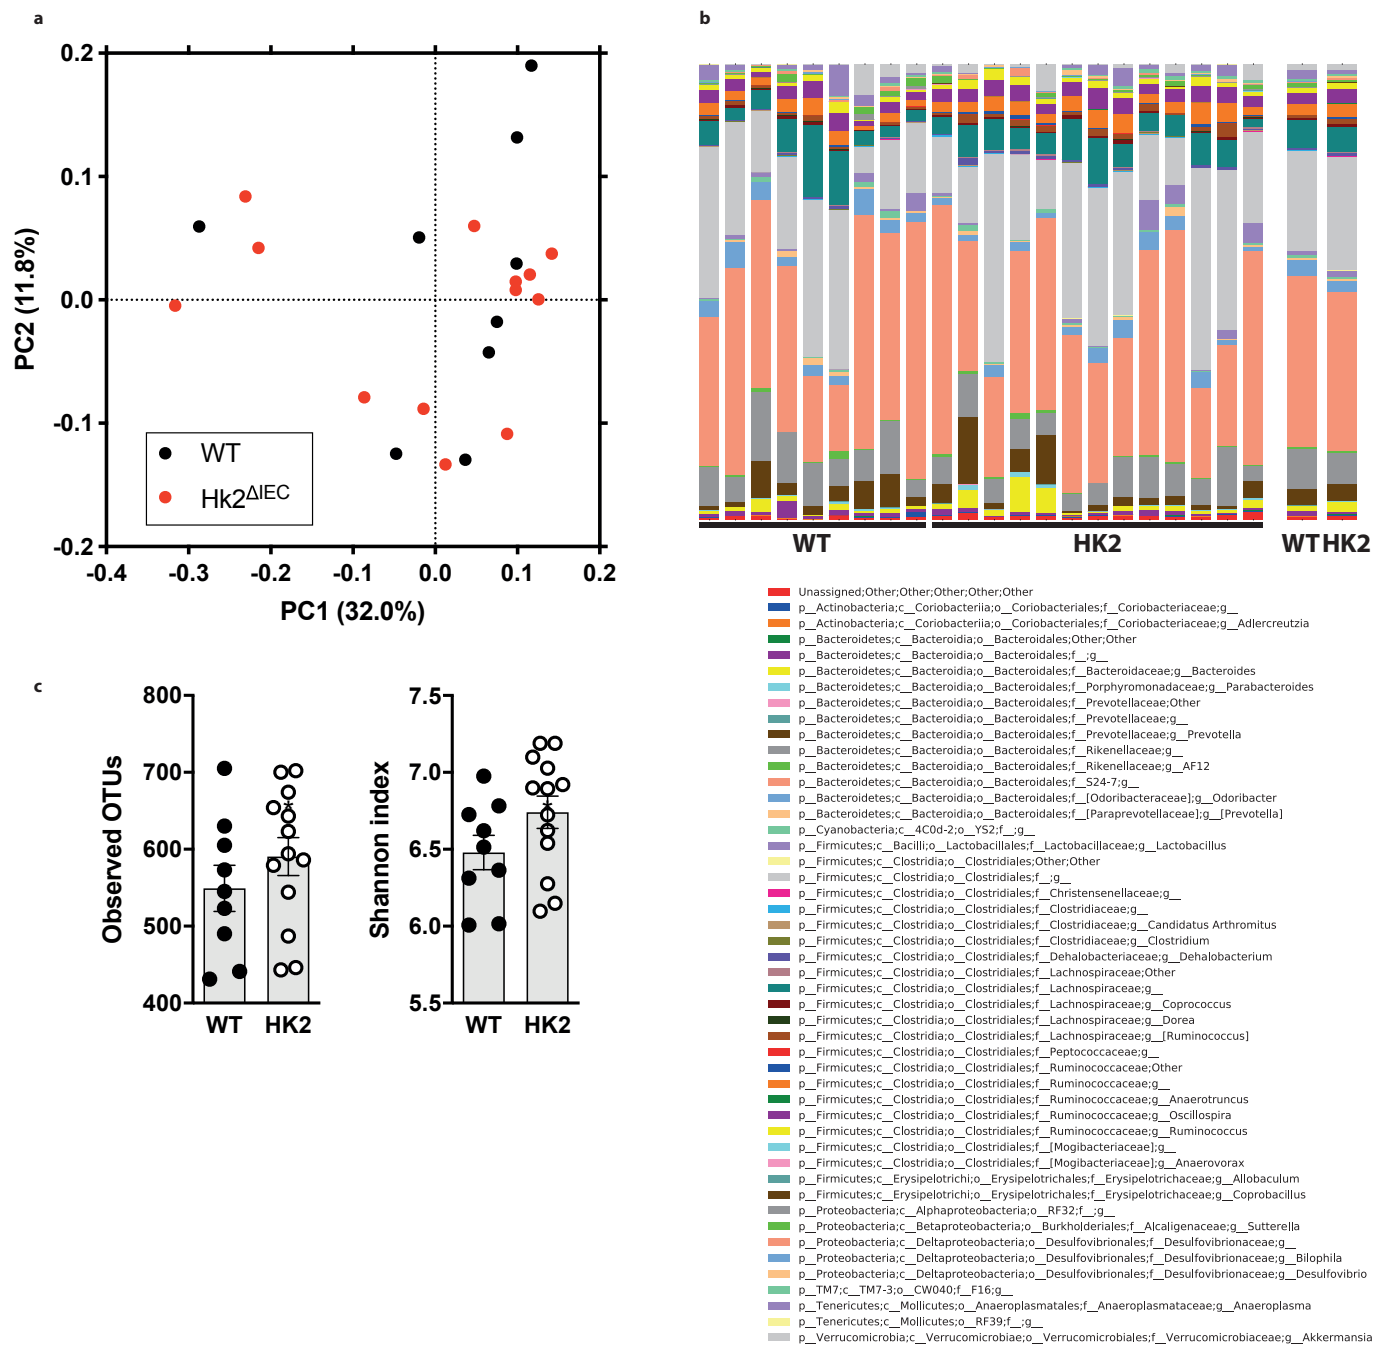

**a Prediction of SCFA production & correlation with *Hk2***

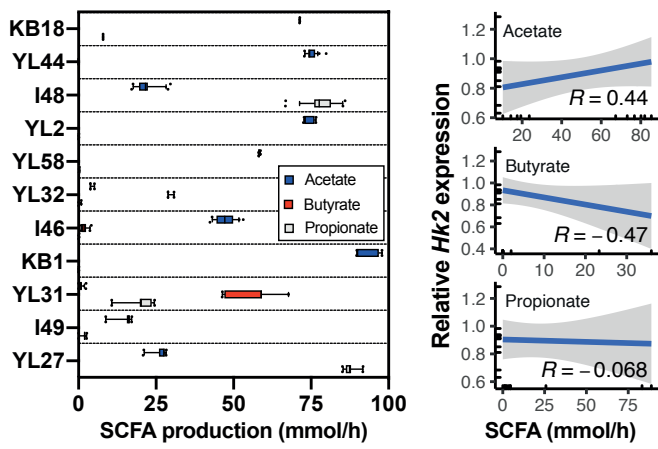

**b Linear model estimation**

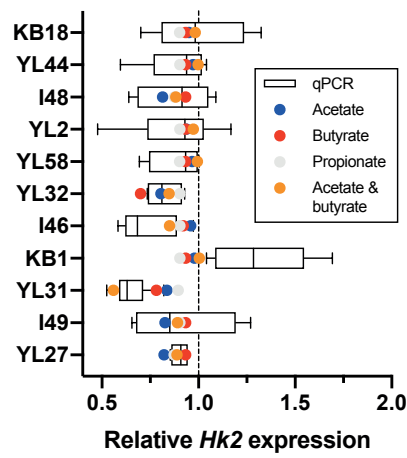

**c Quantified SCFA levels**

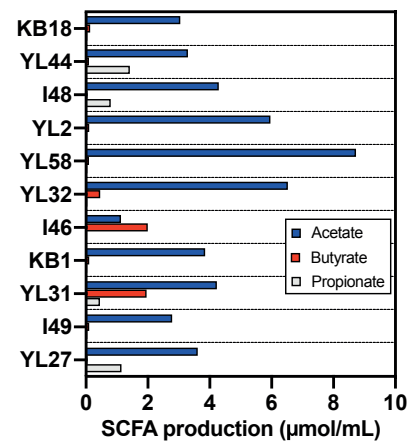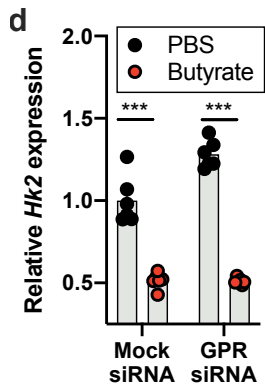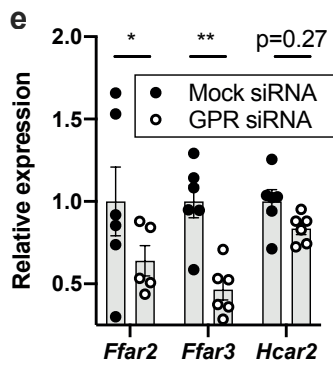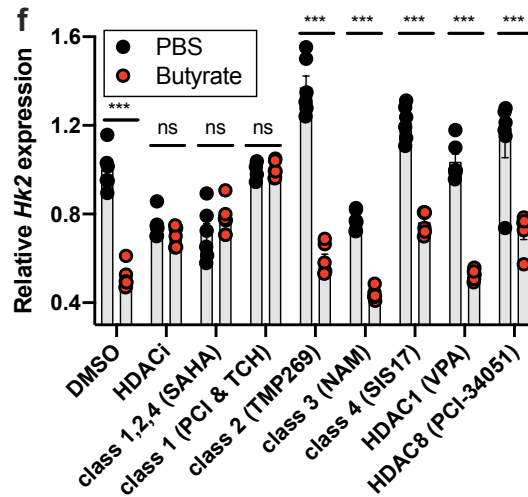

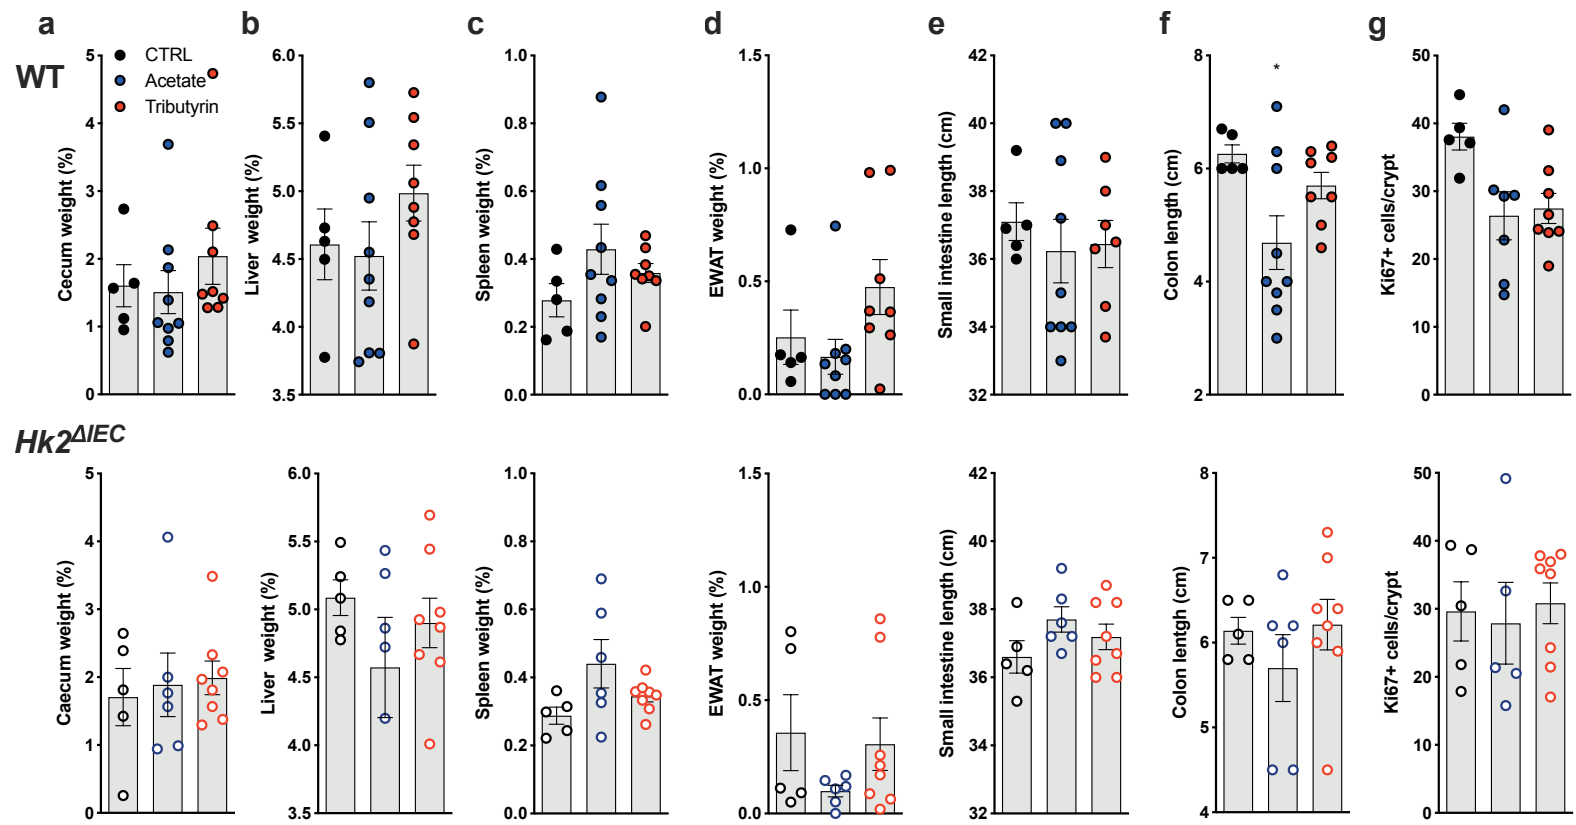

Source: https://www.biorxiv.org/content/biorxiv/early/2020/12/22/2020.12.22.423953.full.pdf
